# Supplementary material
Source: publisher figshare collection journal article supplement (https://acs.figshare.com/ndownloader/files/10060645)

## Supporting Information

# Rhodium-Catalyzed Homocoupling of $\gamma$ -Alkylated *tert*-Propargylic Alcohols

Xiaowei Dou,<sup>\*,†</sup> Na Liu,<sup>†</sup> Jian Yao,<sup>†</sup> and Tao Lu <sup>\*,†,‡</sup>

<sup>†</sup>Department of Organic Chemistry and <sup>‡</sup>State Key Laboratory of Natural Medicines, China Pharmaceutical University, Nanjing 210009, China

*Email: dxw@cpu.edu.cn (Xiaowei Dou);*

*Email: lut163@163.com (Tao Lu)*

## Contents

|                                                                                |     |
|--------------------------------------------------------------------------------|-----|
| 1. General information .....                                                   | S3  |
| 2. Materials .....                                                             | S3  |
| 3. A typical procedure for the synthesis of <b>2a</b> (Table 1, entry 3) ..... | S3  |
| 4. A general procedure for Scheme 2.....                                       | S4  |
| 5. The procedure for Scheme 4 .....                                            | S4  |
| 6. Characterization of the products .....                                      | S5  |
| 7. References.....                                                             | S10 |
| 8. NMR spectra .....                                                           | S11 |

## 1. General information

All air-sensitive manipulations were carried out with standard Schlenk techniques under nitrogen or argon. NMR spectra were recorded on Bruker AVANCE AV-500 spectrometer (500 MHz for  $^1\text{H}$ , 125 MHz for  $^{13}\text{C}$ ) or Bruker AVANCE AV-300 spectrometer (300 MHz for  $^1\text{H}$ , 75 MHz for  $^{13}\text{C}$ ). Chemical shifts were reported in  $\delta$  (ppm) referenced to the residual solvent peak of  $\text{CDCl}_3$  ( $\delta$  7.26) for  $^1\text{H}$  NMR and  $\text{CDCl}_3$  ( $\delta$  77.0) for  $^{13}\text{C}$  NMR. Multiplicity was indicated as follows: s (singlet), d (doublet), t (triplet), q (quartet), m (multiplet), br (broad). Coupling constants were reported in Hertz (Hz). High resolution mass spectra (HRMS) were obtained on an Agilent 1100 LC/DAD/MSD spectrometer (ESI) or Waters GCT Premier mass spectrometer (EI). For thin layer chromatography (TLC), Merck pre-coated TLC plates (Merck 60 F254) were used, and compounds were visualized with a UV light at 254 nm. Further visualization was achieved by staining with  $\text{KMnO}_4$  followed by heating. Flash column chromatography was performed with silica gel (300–400 mesh).

## 2. Materials

Toluene, THF, and 1,4-dioxane were distilled over benzophenone ketyl under  $\text{N}_2$ . Rhodium complex  $[\text{Rh}(\text{OH})(\text{cod})]_2$ <sup>1</sup> was prepared according to the reported procedure. Bisphosphine ligands were purchased and used as received. Propargylic alcohols were prepared according to the reported procedures.<sup>2</sup>

## 3. A typical procedure for the synthesis of 2a (Table 1, entry 3)

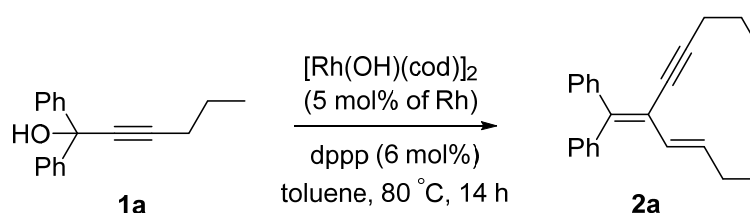

$[\text{Rh}(\text{OH})(\text{cod})]_2$  (2.3 mg, 5.0  $\mu\text{mol}$ , 5 mol % Rh) and dppp (4.9 mg, 12  $\mu\text{mol}$ , 6 mol %) were placed in an oven-dried Schlenk tube under nitrogen. Anhydrous toluene (0.4 mL) was added and the resulting mixture was stirred at 35 °C for 10 min. Substrate **1a** (50.0 mg, 0.20 mmol) and another portion of anhydrous toluene (0.6 mL) were added successively, and the mixture was stirred at 80 °C for 14 h. Upon completion, the reaction mixture was passed

through a short column of silica gel with EtOAc as eluent. The solvent was removed on a rotary evaporator, and the crude product was subjected to silica gel chromatography with petroleum ether to give **2a** (25.8 mg, 86% yield) as a colorless oil.

#### 4. A general procedure for Scheme 2

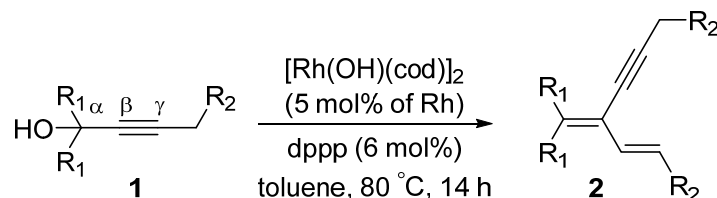

$[\text{Rh}(\text{OH})(\text{cod})]_2$  (2.3 mg, 5.0  $\mu\text{mol}$ , 5 mol % Rh) and dppp (4.9 mg, 12  $\mu\text{mol}$ , 6 mol %) were placed in an oven-dried Schlenk tube under nitrogen. Anhydrous toluene (0.4 mL) was added and the resulting mixture was stirred at 35 °C for 10 min. Substrate **1** (0.20 mmol) and another portion of anhydrous toluene (0.6 mL) were added successively, and the mixture was stirred at 80 °C for 14 h. Upon completion, the reaction mixture was passed through a short column of silica gel with EtOAc as eluent. The solvent was removed on a rotary evaporator, and the crude product was subjected to silica gel chromatography with petroleum ether to give **2** (13 examples, 56–93% yield).

#### 5. The procedure for Scheme 4

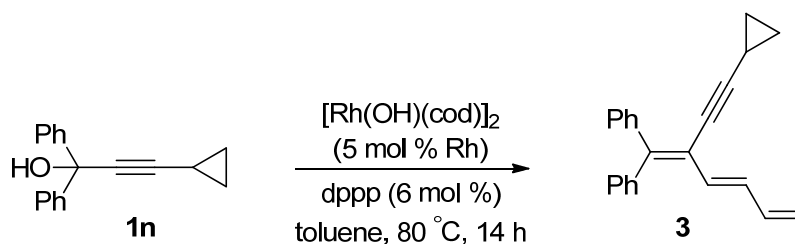

$[\text{Rh}(\text{OH})(\text{cod})]_2$  (2.3 mg, 5.0  $\mu\text{mol}$ , 5 mol % Rh) and dppp (4.9 mg, 12  $\mu\text{mol}$ , 6 mol %) were placed in an oven-dried Schlenk tube under nitrogen. Anhydrous toluene (0.4 mL) was added and the resulting mixture was stirred at 35 °C for 10 min. Substrate **1n** (49.6 mg, 0.20 mmol) and another portion of anhydrous toluene (0.6 mL) were added successively, and the mixture was stirred at 80 °C for 14 h. Upon completion, the reaction mixture was passed through a short column of silica gel with EtOAc as eluent. The solvent was removed on a

rotary evaporator, and the crude product was subjected to silica gel chromatography with petroleum ether to give product **3** as a colorless oil (22.2 mg, 75% yield).

## 6. Characterization of the products

### (E)-(2-(But-1-en-1-yl)hept-1-en-3-yne-1,1-diyl)dibenzene (2a)

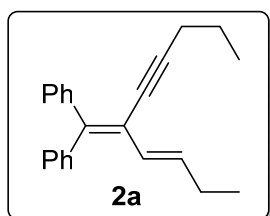

**Compound 2a.** (86% yield at a 0.20 mmol scale, 25.8 mg; 83% yield at a 1.0 mmol scale, 124.6 mg). Purification by flash chromatography with petroleum ether as the eluent, colorless oil.  $^1\text{H}$  NMR (500 MHz,  $\text{CDCl}_3$ )  $\delta$  0.93 (t,  $J$  = 7.3 Hz, 3H), 1.02 (t,  $J$  = 7.4 Hz, 3H), 1.44–1.61 (m, 2H), 2.07–2.21 (m, 2H), 2.31 (t,  $J$  = 6.8 Hz, 2H), 6.23 (d,  $J$  = 15.4 Hz, 1H), 6.38 (dt,  $J$  = 17.2 Hz, 6.7 Hz, 1H), 7.19 (d,  $J$  = 7.3 Hz, 2H), 7.25–7.40 (m, 6H), 7.44 (d,  $J$  = 7.4 Hz, 2H);  $^{13}\text{C}$  NMR (125 MHz,  $\text{CDCl}_3$ )  $\delta$  13.5, 13.6, 21.6, 22.0, 25.8, 79.0, 95.6, 120.1, 127.1, 127.2, 127.4, 127.7, 127.9, 130.3, 130.6, 136.9, 141.3, 142.5, 145.5; HRMS (EI) calcd for  $\text{C}_{23}\text{H}_{24}$   $[\text{M}]^+$  300.1873, found 300.1877.

### (E)-(2-(Pent-1-en-1-yl)oct-1-en-3-yne-1,1-diyl)dibenzene (2b)

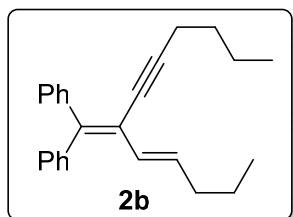

**Compound 2b.** (76% yield at a 0.20 mmol scale, 24.9 mg). Purification by flash chromatography with petroleum ether as the eluent, colorless oil.  $^1\text{H}$  NMR (300 MHz,  $\text{CDCl}_3$ )  $\delta$  0.84–0.92 (m, 6H), 1.26–1.44 (m, 6H), 2.03–2.10 (m, 2H), 2.30 (t,  $J$  = 6.8 Hz, 2H), 6.21 (d,  $J$  = 15.3 Hz, 1H), 6.34 (dt,  $J$  = 17.2 Hz, 6.9 Hz, 1H), 7.17 (d,  $J$  = 6.6 Hz, 2H), 7.20–7.34 (m, 6H), 7.42 (d,  $J$  = 6.8 Hz, 2H);  $^{13}\text{C}$  NMR (75 MHz,  $\text{CDCl}_3$ )  $\delta$  13.6, 13.7, 19.3, 21.9, 22.5, 29.7, 30.6, 78.9, 95.7, 120.2, 127.1, 127.2, 127.4, 127.9, 128.7, 130.3, 130.6, 135.3, 141.3, 142.5, 145.4; HRMS (EI) calcd for  $\text{C}_{25}\text{H}_{28}$   $[\text{M}]^+$  328.2186, found 328.2191.

### (E)-(2-(Hex-1-en-1-yl)non-1-en-3-yne-1,1-diyl)dibenzene (2c)

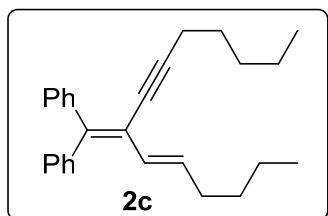

**Compound 2c.** (73% yield at a 0.20 mmol scale, 26.0 mg). Purification by flash chromatography with petroleum ether as the eluent, colorless oil.  $^1\text{H}$  NMR (300 MHz,  $\text{CDCl}_3$ )  $\delta$  0.8 (t,  $J$  = 6.3 Hz, 6H), 1.18–1.31 (m, 8H), 1.32–1.42 (m, 2H), 1.98–2.05 (m, 2H), 2.23 (t,  $J$  = 6.9 Hz, 2H), 6.12 (d,  $J$  = 15.3 Hz, 1H), 6.22 (dt,  $J$  = 15.1 Hz, 7.5 Hz, 1H), 7.08 (d,  $J$  = 7.4 Hz, 2H), 7.14–7.28 (m, 6H), 7.33 (d,  $J$  = 7.5 Hz, 2H);  $^{13}\text{C}$  NMR (75 MHz,  $\text{CDCl}_3$ )  $\delta$  13.90, 13.95, 19.6, 22.3, 28.2, 29.7, 31.0, 31.5, 32.4, 79.0,

95.7, 120.2, 127.1, 127.2, 127.4, 127.9, 128.6, 130.3, 130.6, 135.5, 141.3, 142.5, 145.4;  $C_{27}H_{32}$   $[M]^+$  356.2499, found 356.2503.

(E)-(7-Methyl-2-(4-methylpent-1-en-1-yl)oct-1-en-3-yne-1,1-diyl)dibenzene (2d)

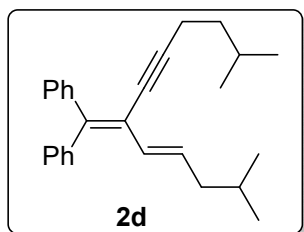

**Compound 2d.** (75% yield at a 0.20 mmol scale, 26.7 mg).

Purification by flash chromatography with petroleum ether as the eluent, colorless oil.  $^1H$  NMR (300 MHz,  $CDCl_3$ )  $\delta$  0.84–0.90 (m, 12H), 1.37 (t,  $J$  = 7.1 Hz, 2H), 1.55–1.70 (m, 2H), 1.97 (t,  $J$  = 6.8 Hz, 2H), 2.31 (t,  $J$  = 7.2 Hz, 2H), 6.17 (d,  $J$  = 15.2 Hz, 1H), 6.31

(dt,  $J$  = 15.1 Hz, 7.6 Hz, 1H), 7.15 (d,  $J$  = 6.5 Hz, 2H), 7.21–7.41 (m, 8H);  $^{13}C$  NMR (75 MHz,  $CDCl_3$ )  $\delta$  17.5, 22.1, 22.3, 26.9, 28.6, 37.3, 42.0, 78.9, 95.6, 120.1, 127.1, 127.2, 127.3, 127.8, 129.6, 130.2, 130.6, 134.2, 141.3, 142.4, 145.4; HRMS (EI) calcd for  $C_{27}H_{32}$   $[M]^+$  356.2499, found 356.2505.

(E)-(2-(4-Phenylbut-1-yn-1-yl)penta-1,3-diene-1,1,5-triyl)tribenzene (2e)

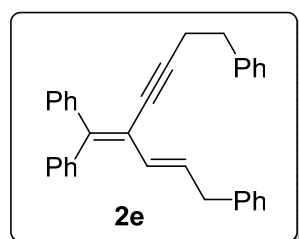

**Compound 2e.** (85% yield at a 0.20 mmol scale, 36.0 mg).

Purification by flash chromatography with petroleum ether as the eluent, yellowish oil.  $^1H$  NMR (300 MHz,  $CDCl_3$ )  $\delta$  2.57 (t,  $J$  = 7.4 Hz, 2H), 2.75 (t,  $J$  = 7.3 Hz, 2H), 3.39 (d,  $J$  = 6.0 Hz, 2H), 6.25 (d,  $J$  = 15.3 Hz, 1H), 6.31–6.38 (m, 1H), 7.14 (d,  $J$  = 7.0 Hz, 8H),

7.32–7.22 (m, 10H), 7.38 (d,  $J$  = 5.3 Hz, 2H);  $^{13}C$  NMR (75 MHz,  $CDCl_3$ )  $\delta$  21.6, 34.7, 39.0, 79.5, 94.7, 119.6, 126.0, 126.1, 127.3, 127.4, 127.9, 128.3, 128.4, 128.6, 129.9, 130.3, 130.6, 140.3, 140.7, 141.1, 142.3, 146.5; HRMS (EI) calcd for  $C_{33}H_{28}$   $[M]^+$  424.2186, found 424.2191.

(E)-(7-Chloro-2-(4-chlorobut-1-en-1-yl)hept-1-en-3-yne-1,1-diyl)dibenzene (2f)

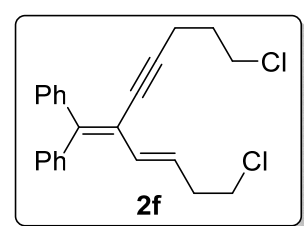

**Compound 2f.** (91% yield at a 0.20 mmol scale, 33.5 mg).

Purification by flash chromatography with petroleum ether as the eluent, yellowish oil.  $^1H$  NMR (300 MHz,  $CDCl_3$ )  $\delta$  1.83–1.91 (m, 2H), 2.50–2.56 (m, 4H), 3.42 (t,  $J$  = 6.4 Hz, 2H), 3.53 (t,  $J$  = 7.0 Hz, 2H), 6.20–6.35 (m, 2H), 7.14 (d,  $J$  = 6.2 Hz, 2H), 7.24–7.39 (m, 8

H);  $^{13}C$  NMR (75 MHz,  $CDCl_3$ )  $\delta$  17.0, 31.2, 35.8, 43.5, 43.9, 79.7, 93.5, 119.3, 127.56, 127.59, 128.0, 129.9, 130.1, 130.5, 131.1, 140.7, 142.3, 147.6; HRMS (EI) calcd for  $C_{23}H_{22}Cl_2$   $[M]^+$  368.1093, found 368.1097.

(5-Methyl-2-(2-methylprop-1-en-1-yl)hex-1-en-3-yne-1,1-diyl)dibenzene (2g)

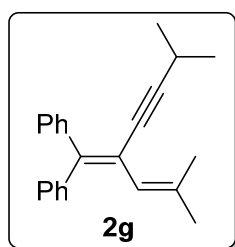

**Compound 2g.** (56% yield at a 0.20 mmol scale, 16.8 mg). Purification by flash chromatography with petroleum ether as the eluent, white solid.  $^1\text{H}$  NMR (300 MHz,  $\text{CDCl}_3$ )  $\delta$  1.06 (d,  $J = 6.8$  Hz, 6H), 1.70 (s, 3H), 1.89 (s, 3H), 2.60 (hept,  $J = 6.8$  Hz, 1H), 5.7 (s, 1H), 7.14 (d,  $J = 6.9$  Hz, 2H), 7.20–7.28 (m, 6 H), 7.40 (d,  $J = 7.1$  Hz, 2H);  $^{13}\text{C}$  NMR (75 MHz,  $\text{CDCl}_3$ )  $\delta$  19.8, 21.4, 22.4, 26.9, 80.9, 100.2, 118.4, 123.7, 126.98, 126.99, 127.3, 127.6, 130.4, 130.6, 136.7, 141.7, 142.4, 147.4; HRMS (EI) calcd for  $\text{C}_{23}\text{H}_{24} [\text{M}]^+$  300.1873, found 300.1879.

(E)-4,4'-(2-(But-1-en-1-yl)hept-1-en-3-yne-1,1-diyl)bis(fluorobenzene) (2h)

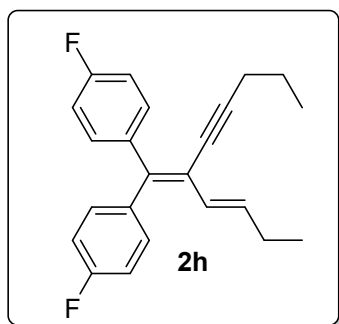

**Compound 2h.** (87% yield at a 0.20 mmol scale, 29.2 mg). Purification by flash chromatography with petroleum ether as the eluent, colorless oil.  $^1\text{H}$  NMR (500 MHz,  $\text{CDCl}_3$ )  $\delta$  0.92 (t,  $J = 7.4$  Hz, 3H), 0.99 (t,  $J = 7.4$  Hz, 3H), 1.51 (sext,  $J = 7.2$  Hz, 2H), 2.13 (quint,  $J = 7.2$  Hz, 2H), 2.30 (t,  $J = 7.0$  Hz, 2H), 6.15 (d,  $J = 15.2$  Hz, 1H), 6.36 (dt,  $J = 15.2$  Hz, 6.7 Hz, 1H), 6.95 (t,  $J = 8.7$  Hz, 2H), 7.02 (t,  $J = 8.7$  Hz, 2H), 7.10–7.13 (m, 2 H), 7.36–7.39 (m, 2 H);  $^{13}\text{C}$  NMR (125 MHz,  $\text{CDCl}_3$ )  $\delta$  13.47, 13.50, 21.6, 22.0, 25.8, 78.8, 95.9, 114.3, 114.4, 114.9, 115.1, 120.5, 127.3, 131.95, 132.02, 132.2, 132.3, 137.0, 137.5, 138.3, 143.1, 161.0, 161.1, 163.0, 163.1; HRMS (EI) calcd for  $\text{C}_{23}\text{H}_{22}\text{F}_2 [\text{M}]^+$  336.1684, found 336.1693.

(E)-4,4'-(2-(But-1-en-1-yl)hept-1-en-3-yne-1,1-diyl)bis(fluorobenzene) (2i)

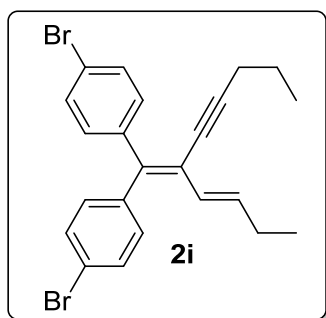

**Compound 2i.** (70% yield at a 0.20 mmol scale, 32.1 mg). Purification by flash chromatography with petroleum ether as the eluent, yellowish oil.  $^1\text{H}$  NMR (500 MHz,  $\text{CDCl}_3$ )  $\delta$  0.92 (t,  $J = 7.4$  Hz, 3H), 0.98 (d,  $J = 7.5$  Hz, 3H), 1.27 (d,  $J = 9.4$  Hz, 2H), 1.50–1.57 (m, 2H), 2.04–2.19 (m, 2H), 2.30 (t,  $J = 6.9$  Hz, 2H), 6.14 (d,  $J = 15.2$  Hz, 1H), 6.33–6.44 (m, 1H), 7.01 (d,  $J = 8.3$  Hz, 2H), 7.23–7.28 (m, 2H), 7.39 (d,  $J = 8.4$  Hz, 2H), 7.46 (d,  $J = 8.3$  Hz, 2H);  $^{13}\text{C}$  NMR (125 MHz,  $\text{CDCl}_3$ )  $\delta$  13.5, 21.6, 21.9, 25.8, 30.9, 78.7, 96.6, 121.2, 121.4, 121.7, 127.2, 130.7, 131.3, 132.0, 132.3, 138.3, 139.7, 140.9, 142.6; HRMS (EI) calcd for  $\text{C}_{23}\text{H}_{22}^{79}\text{Br}_2 [\text{M}]^+$  456.0083, found 456.0087; calcd for  $\text{C}_{23}\text{H}_{22}^{81}\text{Br}_2 [\text{M}]^+$  460.0045, found 460.0050.

(E)-4,4'-(2-(But-1-en-1-yl)hept-1-en-3-yne-1,1-diyl)bis(methoxybenzene) (2j)

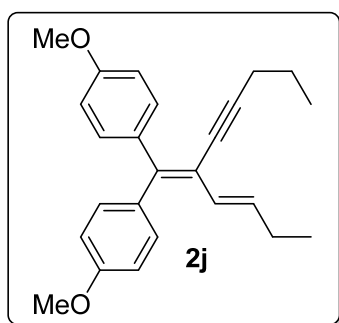

**Compound 2j.** (93% yield at a 0.20 mmol scale, 33.5 mg).

Purification by flash chromatography with petroleum ether as the eluent, colorless oil.  $^1\text{H}$  NMR (500 MHz,  $\text{CDCl}_3$ )  $\delta$  0.90 (t,  $J$  = 7.4 Hz, 3H), 1.00 (t,  $J$  = 7.4 Hz, 3H), 1.46–1.54 (m, 2H), 2.07–2.17 (m, 2H), 2.31 (t,  $J$  = 6.9 Hz, 2H), 3.80 (s, 3H), 3.83 (s, 3H), 6.22 (d,  $J$  = 15.3 Hz, 1H), 6.26–6.37 (m, 1H), 6.79 (d,  $J$  = 8.3 Hz, 2H), 6.86 (d,  $J$  = 8.2 Hz, 2H), 7.07 (d,  $J$  = 8.1 Hz, 2H),

7.36 (d,  $J$  = 8.3 Hz, 2H);  $^{13}\text{C}$  NMR (125 MHz,  $\text{CDCl}_3$ )  $\delta$  13.7, 13.8, 21.7, 22.1, 25.9, 55.2, 79.5, 95.0, 112.7, 113.3, 118.4, 128.1, 131.0, 131.8, 133.9, 135.3, 135.9, 145.0, 158.8, 158.8; HRMS (EI) calcd for  $\text{C}_{25}\text{H}_{28}\text{O}_2$   $[\text{M}]^+$  360.2084, found 360.2094.

(E)-9-(Dec-3-en-6-yn-5-ylidene)-9H-fluorene (2k)

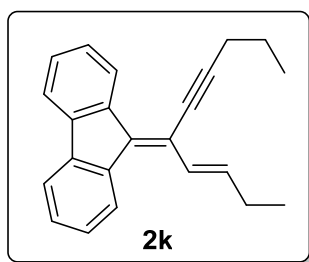

**Compound 2k.** (71% yield at a 0.20 mmol scale, 21.2 mg).

Purification by flash chromatography with petroleum ether as the eluent, yellow oil.  $^1\text{H}$  NMR (500 MHz,  $\text{CDCl}_3$ )  $\delta$  1.14 (t,  $J$  = 7.4 Hz, 3H), 1.18 (t,  $J$  = 7.4 Hz, 3H), 1.78 (sext,  $J$  = 7.2 Hz, 2H), 2.39 (quint,  $J$  = 7.2 Hz, 2H), 2.64 (t,  $J$  = 7.1 Hz, 2H), 6.67 (dt,  $J$  = 15.2 Hz, 6.6 Hz, 1H), 7.24–7.33 (m, 5H), 7.68–7.72 (m, 2H), 7.89 (d,  $J$  = 7.7 Hz, 1H), 8.78 (d,  $J$  = 7.8 Hz, 1H);  $^{13}\text{C}$  NMR (75 MHz,  $\text{CDCl}_3$ )  $\delta$  13.4, 13.8, 22.1, 22.2,

26.2, 80.2, 103.0, 122.1, 124.8, 126.2, 126.8, 126.9, 127.5, 127.7, 127.8, 137.0, 138.0, 139.0, 139.7, 140.2, 141.4; HRMS (EI) calcd for  $\text{C}_{23}\text{H}_{22}$   $[\text{M}]^+$  298.1716, found 298.1724.

(E)-Dec-3-en-6-yn-5-ylidenecyclohexane (2l)

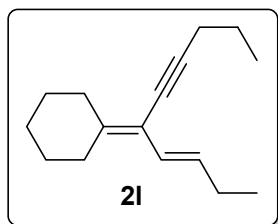

**Compound 2l.** (73% yield at a 0.20 mmol scale, 15.8 mg).

Purification by flash chromatography with petroleum ether as the eluent, colorless oil.  $^1\text{H}$  NMR (300 MHz,  $\text{CDCl}_3$ )  $\delta$  1.04 (t,  $J$  = 7.4 Hz, 6H), 1.40–1.71 (m, 8H), 2.12–2.22 (m, 2H), 2.31–2.44 (m, 4H), 2.53 (d,  $J$  = 5.5 Hz, 2H), 6.08–6.21 (m, 1H), 6.40 (d,  $J$  = 15.1 Hz,

1H);  $^{13}\text{C}$  NMR (75 MHz,  $\text{CDCl}_3$ )  $\delta$  13.6, 13.8, 21.5, 22.5, 25.8, 26.7, 27.8, 27.9, 29.9, 34.4, 77.8, 94.1, 114.3, 124.2, 134.3, 146.9; HRMS (EI) calcd for  $\text{C}_{16}\text{H}_{24}$   $[\text{M}]^+$  216.1873, found 216.1878.



(E)-5-(Pentan-3-ylidene)dec-3-en-6-yne (2m)

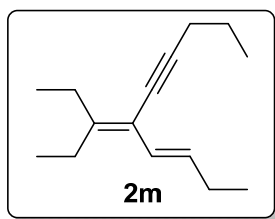

**Compound 2m.** (68% yield at a 0.20 mmol scale, 13.9 mg). Purification by flash chromatography with petroleum ether as the eluent, colorless oil.  $^1\text{H}$  NMR (500 MHz,  $\text{CDCl}_3$ )  $\delta$  1.04 (t,  $J = 7.6$  Hz, 12H), 1.56–1.65 (m,  $J = 12.8$ , 2H), 2.10–2.30 (m, 4H), 2.32–2.45 (m, 4H), 6.04–6.23 (m, 1H), 6.30 (d,  $J = 15.2$  Hz, 1H);  $^{13}\text{C}$  NMR (75 MHz,  $\text{CDCl}_3$ )  $\delta$  12.7, 13.3, 13.6, 13.8, 21.6, 22.5, 24.1, 25.9, 28.6, 77.8, 94.1, 116.5, 124.7, 134.1, 150.7; HRMS (EI) calcd for  $\text{C}_{15}\text{H}_{24}$   $[\text{M}]^+$  204.1873, found 204.1884.

((E)-3-((E)-But-1-en-1-yl)oct-2-en-4-yn-2-yl)benzene (E-2n)

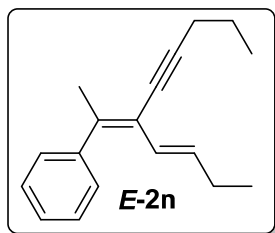

**Compound E-2n.** (45% yield at a 0.40 mmol scale, 21.4 mg). Purification by flash chromatography with petroleum ether/ $\text{CH}_2\text{Cl}_2$  (30:1, v/v) as the eluent, colorless oil.  $^1\text{H}$  NMR (500 MHz,  $\text{CDCl}_3$ )  $\delta$  1.00 (t,  $J = 7.4$  Hz, 3H), 1.14 (t,  $J = 7.4$  Hz, 3H), 1.73 (sext,  $J = 7.2$  Hz, 2H), 2.11 (quint,  $J = 7.2$  Hz, 2H), 2.39 (s, 3H), 2.52 (t,  $J = 7.0$  Hz, 2H), 6.12 (d,  $J = 15.3$  Hz, 1H), 6.20 (dt,  $J = 15.2$  Hz, 6.5 Hz, 1H), 7.24 (d,  $J = 7.1$  Hz, 2H), 7.31 (t,  $J = 7.4$  Hz, 1H), 7.39 (t,  $J = 7.5$  Hz, 2H);  $^{13}\text{C}$  NMR (125 MHz,  $\text{CDCl}_3$ )  $\delta$  13.6, 13.7, 21.6, 22.5, 24.2, 25.6, 78.1, 96.5, 119.5, 126.4, 126.9, 128.0, 128.4, 134.8, 142.2, 142.3; HRMS (EI) calcd for  $\text{C}_{18}\text{H}_{22}$   $[\text{M}]^+$  238.1716, found 238.1714.

((Z)-3-((E)-But-1-en-1-yl)oct-2-en-4-yn-2-yl)benzene (Z-2n)

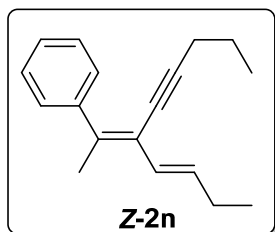

**Compound Z-2n.** (27% yield at a 0.40 mmol scale, 13.0 mg). Purification by flash chromatography with petroleum ether/ $\text{CH}_2\text{Cl}_2$  (30:1, v/v) as the eluent, colorless oil.  $^1\text{H}$  NMR (500 MHz,  $\text{CDCl}_3$ )  $\delta$  0.88 (t,  $J = 7.4$  Hz, 3H), 1.14 (t,  $J = 7.4$  Hz, 3H), 1.46 (sext,  $J = 7.2$  Hz, 2H), 2.21 – 2.33 (m, 7H), 6.37 (dt,  $J = 13.3$  Hz, 6.6 Hz, 1H), 6.52 (d,  $J = 15.1$  Hz, 1H), 7.27 (t,  $J = 7.3$  Hz, 1H), 7.35 (t,  $J = 7.5$  Hz, 2H), 7.48 (d,  $J = 7.1$  Hz, 2H);  $^{13}\text{C}$  NMR (75 MHz,  $\text{CDCl}_3$ )  $\delta$  13.4, 13.7, 20.0, 21.4, 22.0, 25.9, 78.6, 93.7, 118.8, 125.6, 126.7, 127.5, 128.3, 136.4, 140.7, 144.2; HRMS (EI) calcd for  $\text{C}_{18}\text{H}_{22}$   $[\text{M}]^+$  238.1716, found 238.1714.

(E)-2-(Cyclopropylethynyl)hexa-1,3,5-triene-1,1-diyl)dibenzene (3)

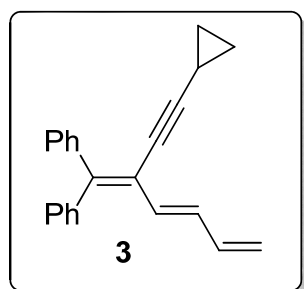

**Compound 3.** (75% yield at a 0.20 mmol scale, 22.2 mg). Purification by flash chromatography with petroleum ether as the eluent, colorless oil.  $^1\text{H}$  NMR (300 MHz,  $\text{CDCl}_3$ )  $\delta$  0.60–0.64 (m, 2H), 0.70 – 0.83 (m, 2H), 1.30 – 1.46 (m, 1H), 5.11 (d,  $J = 10.1$

Hz, 1H), 5.31 (d,  $J = 16.9$  Hz, 1H), 6.20–6.51 (m, 2H), 6.81 (dd,  $J = 14.9, 10.9$  Hz, 1H), 7.14 (d,  $J = 7.3$  Hz, 2H), 7.22–7.35 (m, 6H), 7.39 (d,  $J = 6.6$  Hz, 2H);  $^{13}\text{C}$  NMR (75 MHz,  $\text{CDCl}_3$ )  $\delta$  8.5, 29.8, 73.7, 99.0, 118.0, 119.9, 127.4, 127.6, 119.9, 130.4, 130.7, 131.9, 133.5, 137.1, 141.0, 142.2, 147.9; HRMS (EI) calcd for  $\text{C}_{23}\text{H}_{20}$   $[\text{M}]^+$  296.1560, found 296.1559.

## 7. References

- [1] Uson, R.; Oro, L. A.; Cabeza, J. A. *Inorg. Synth.* **1985**, 23, 126.
- [2] (a) Liu, N.; Zhi, Y.; Yao, J.; Xing, J.; Lu, T.; Dou, X. *Adv. Synth. Catal.* 10.1002/adsc.201701263. (b) Dou, X.; Huang, Y.; Hayashi, T. *Angew. Chem. Int. Ed.* **2016**, 55, 1133.

## 8. NMR spectra

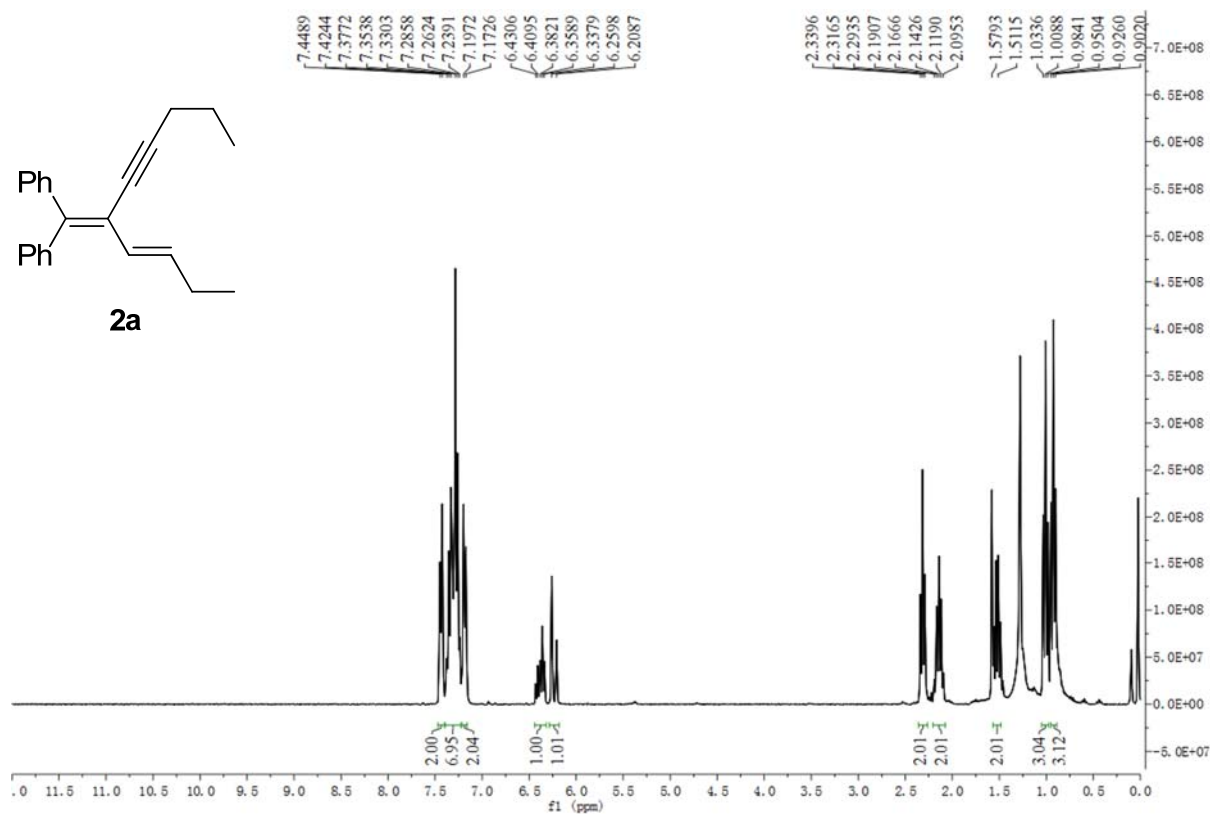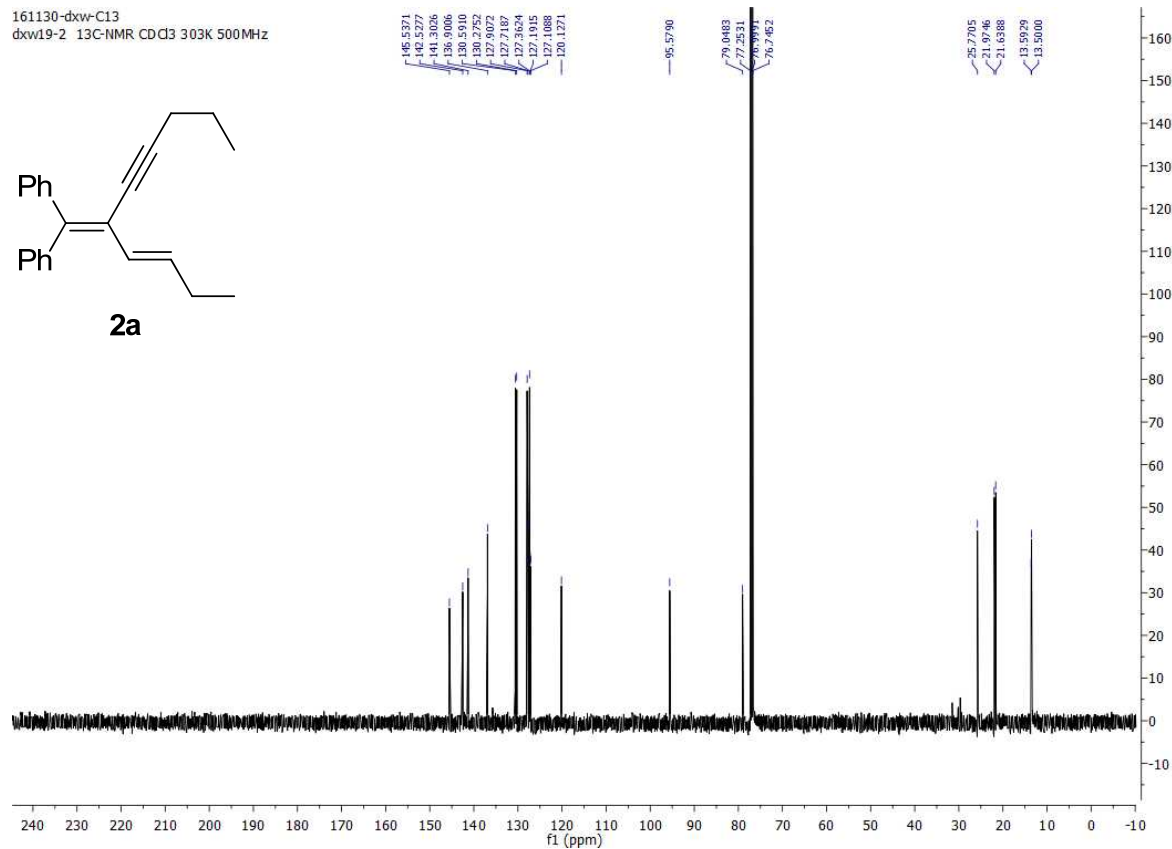

161220-dxw  
dxw-24 1H-NMR CDCl3 303K AV-300

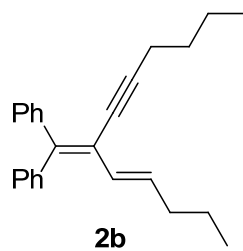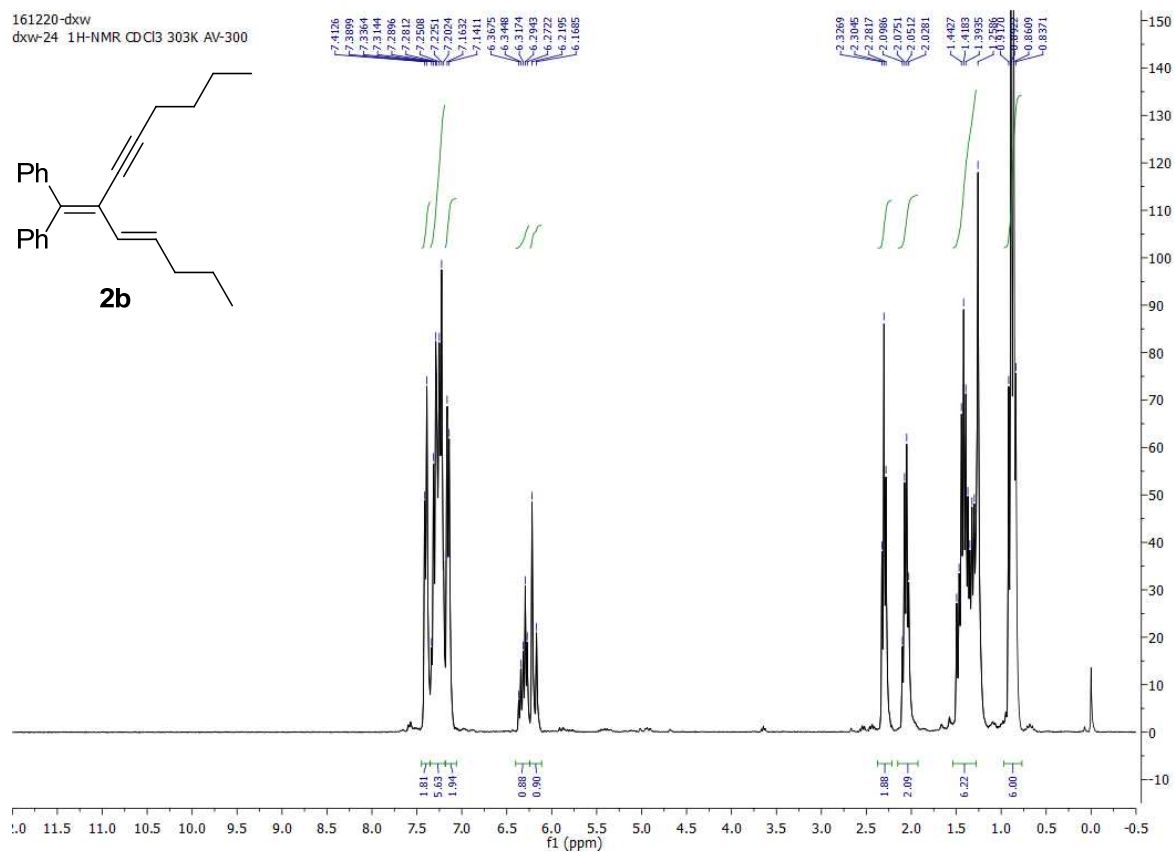

161220-dxw  
dxw-24 13C-NMR CDCl3 303K AV-300

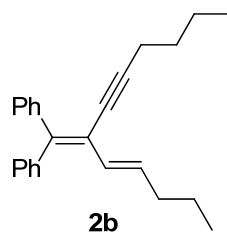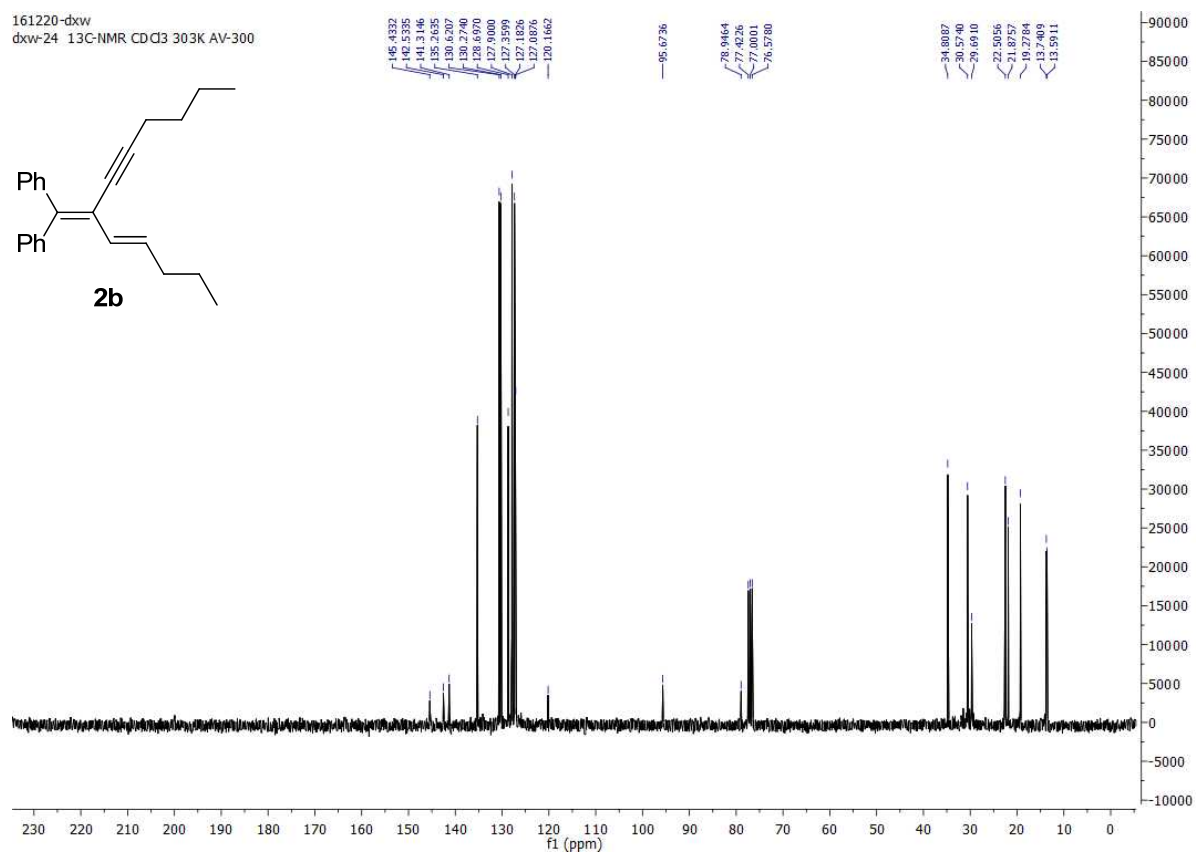

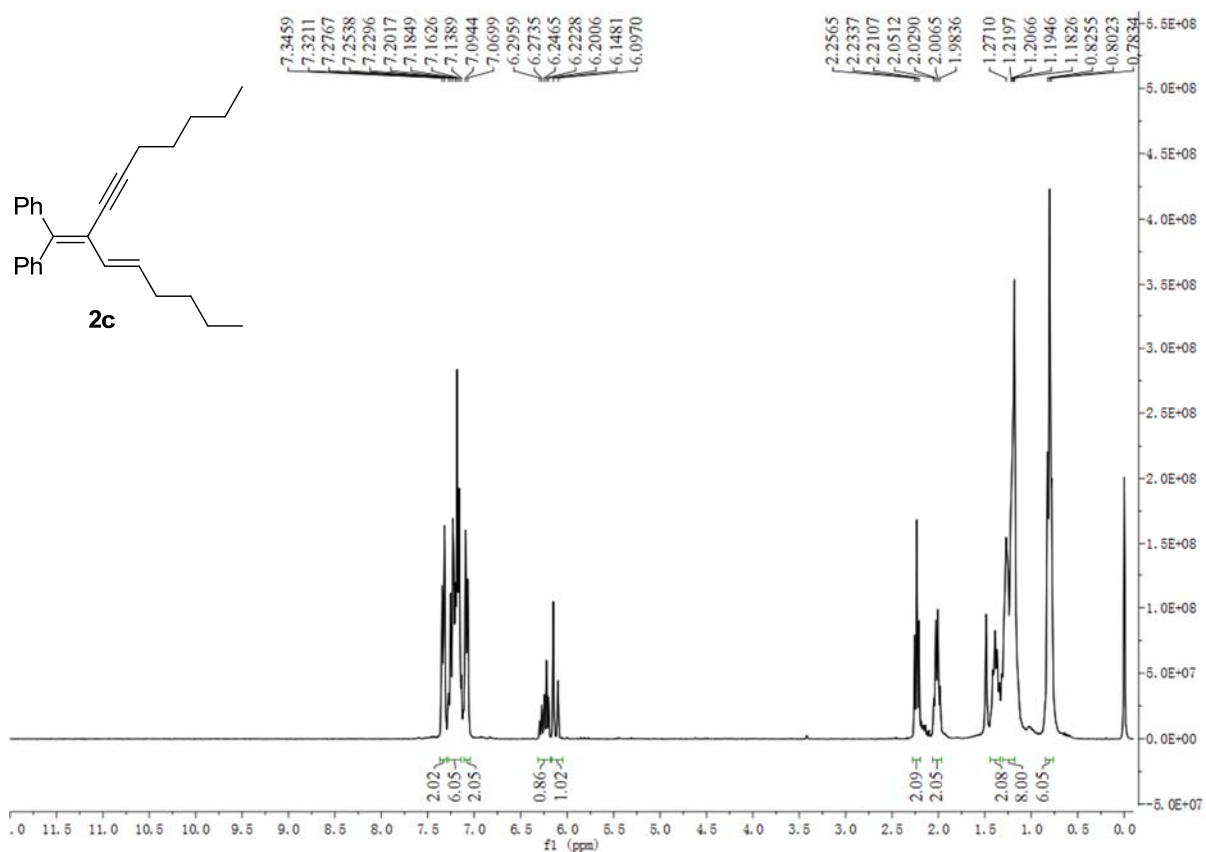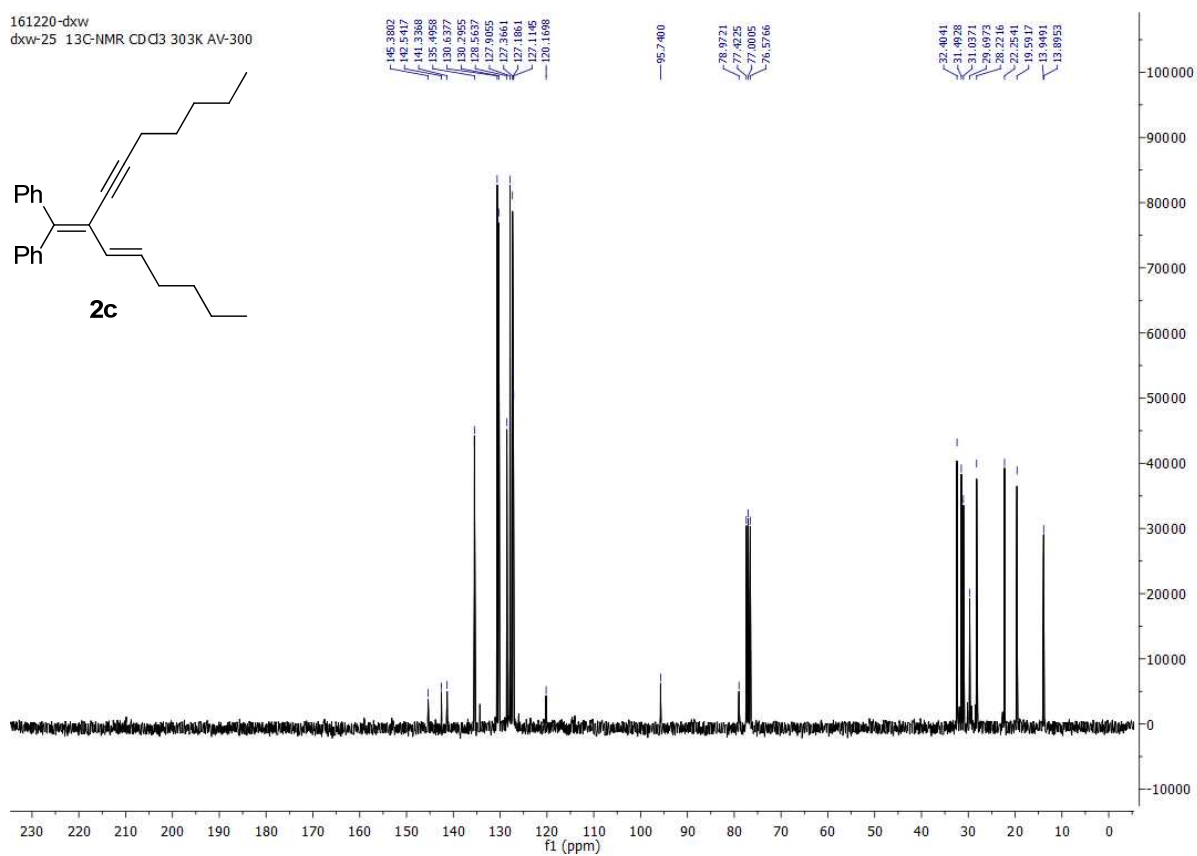

161220-dxw  
dxw-26 1H-NMR CDCl<sub>3</sub> 303K AV-300

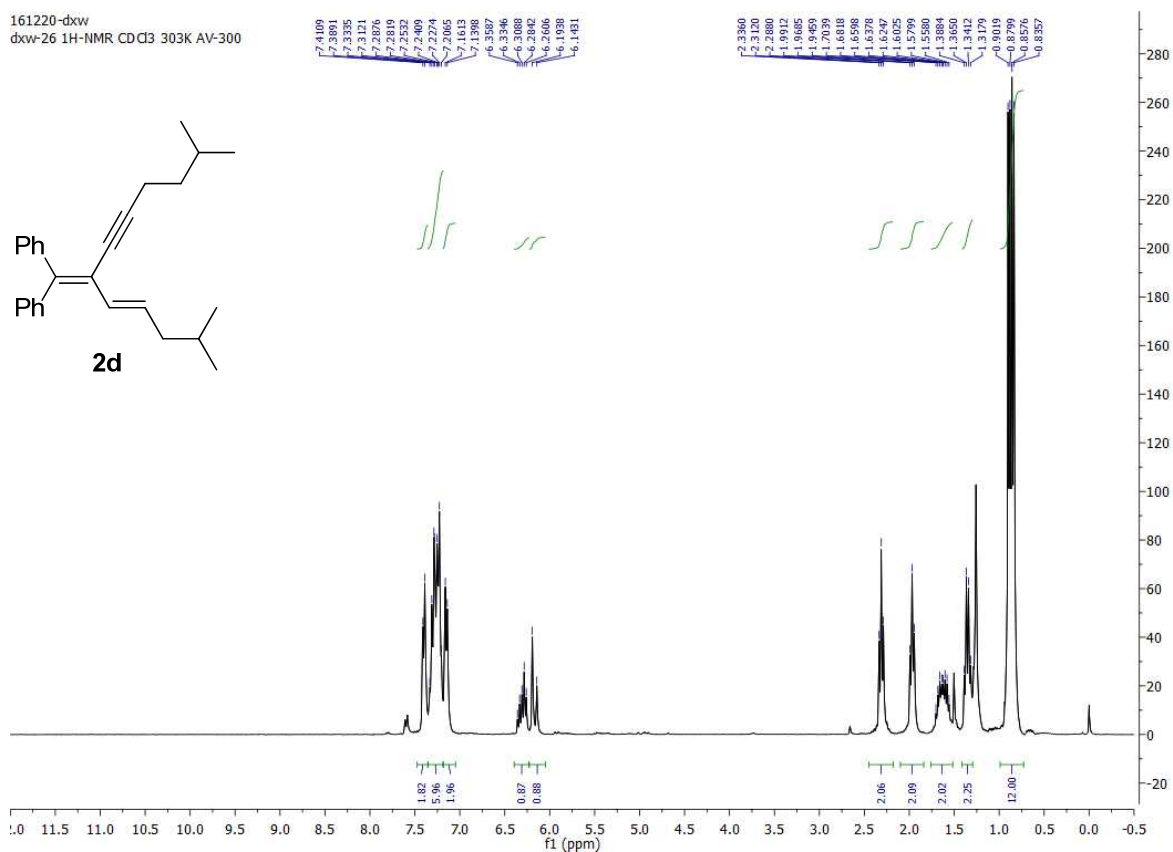

161220-dxw  
dxw-26 13C-NMR CDCl<sub>3</sub> 303K AV-300

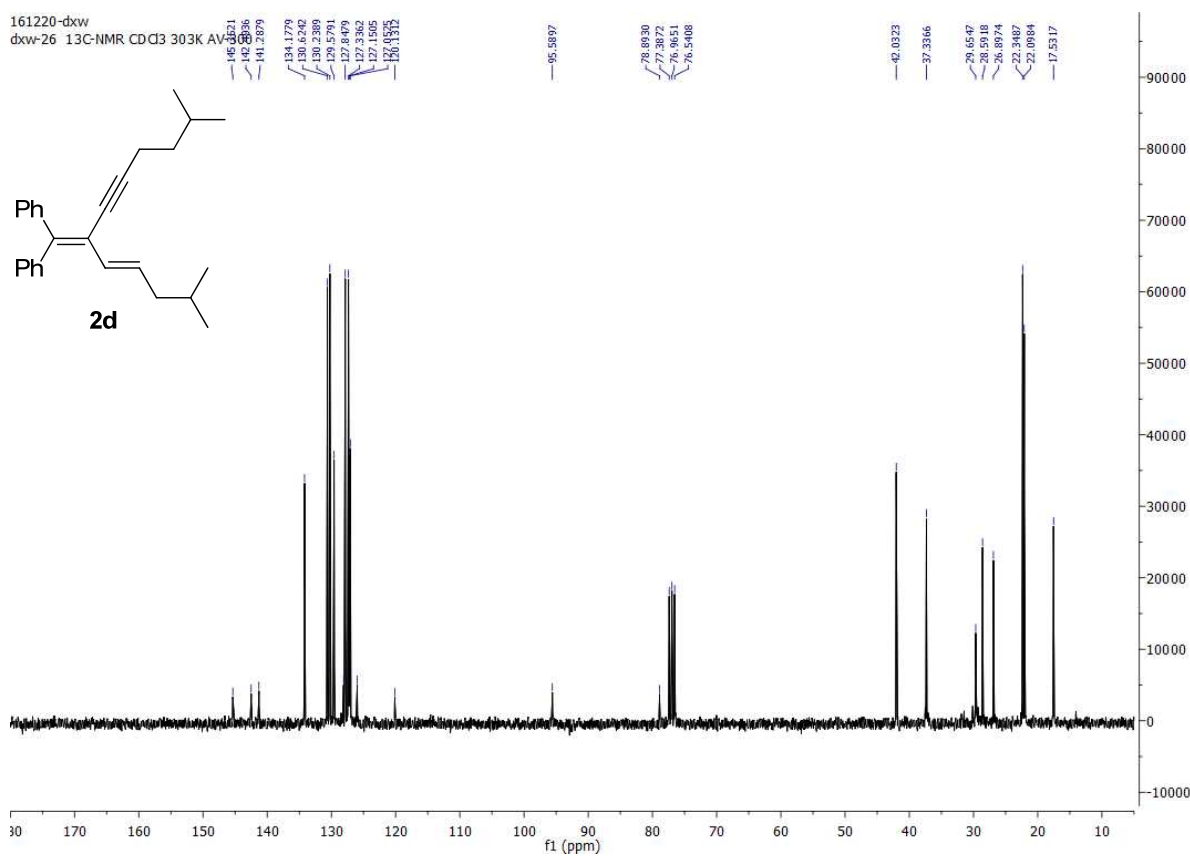

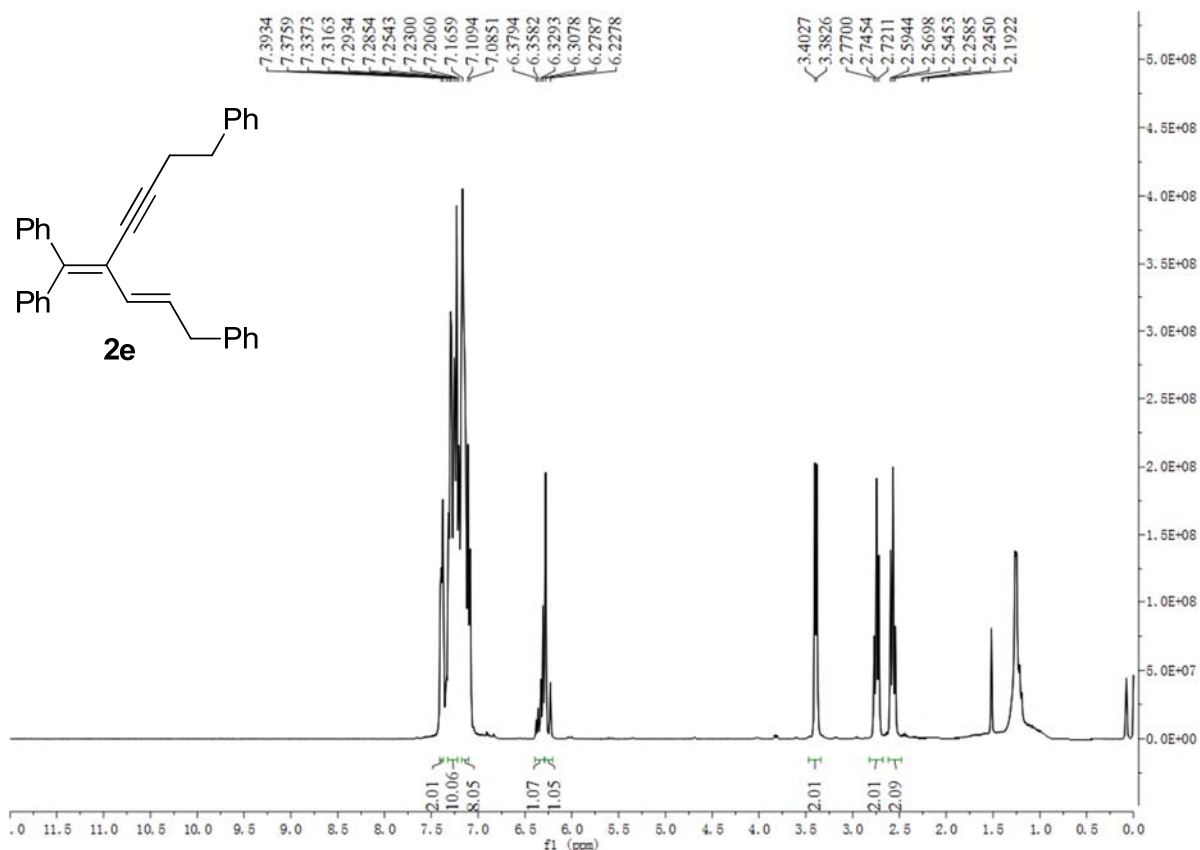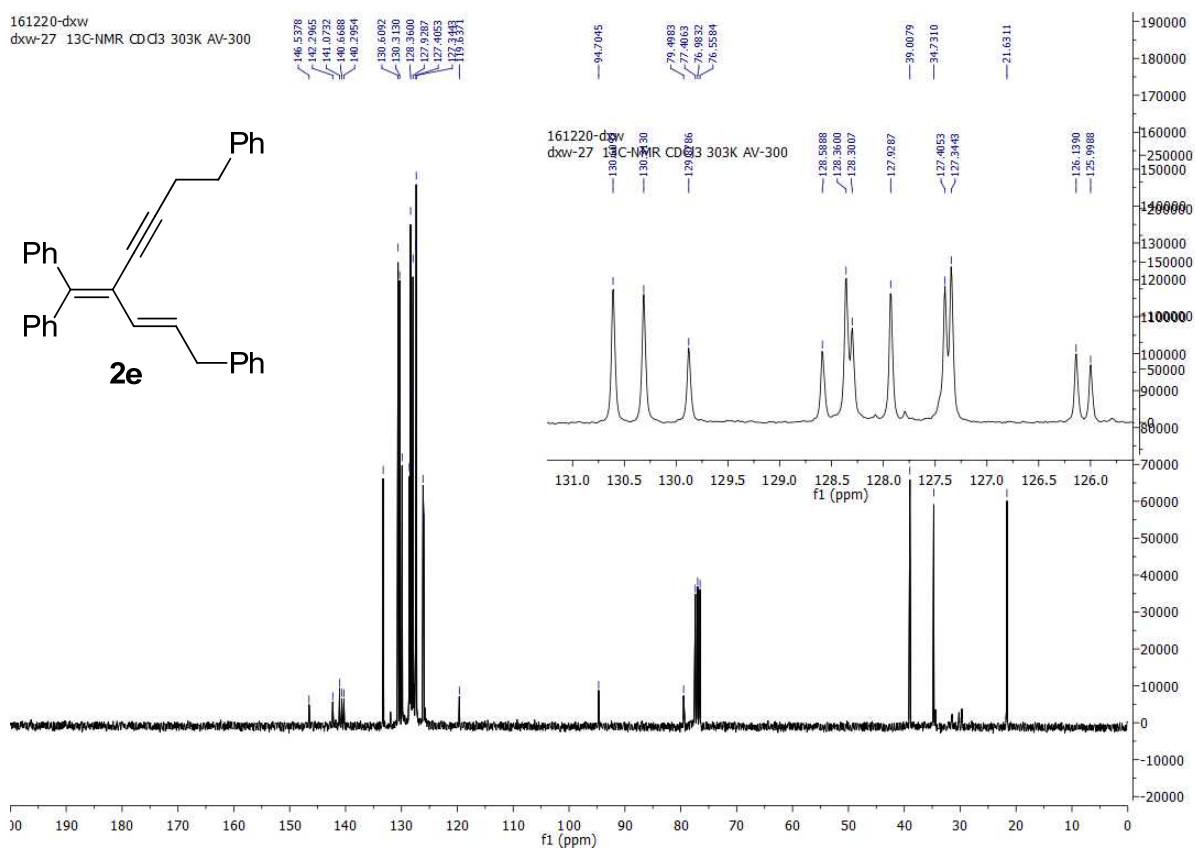

161230-dxw  
dxw-29 1H-NMR CDCl3 303K AV-300

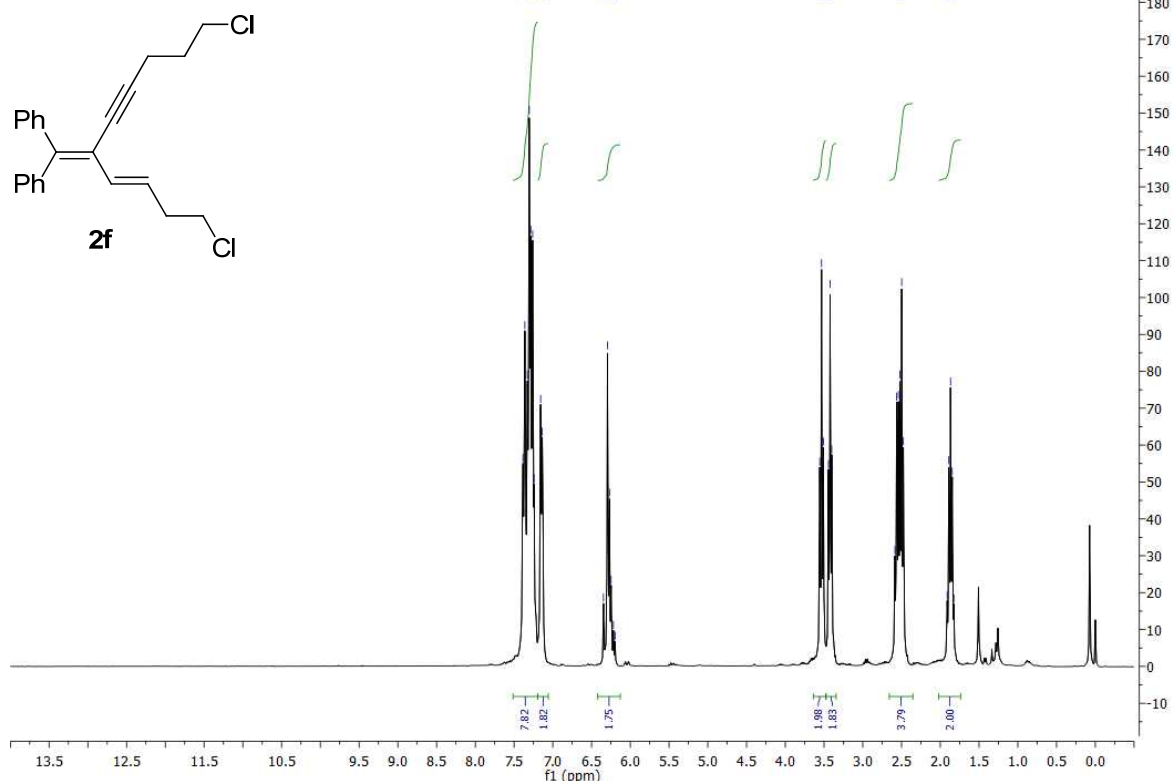

161230-dxw  
dxw-29 13C-NMR CDCl3 303K AV-300

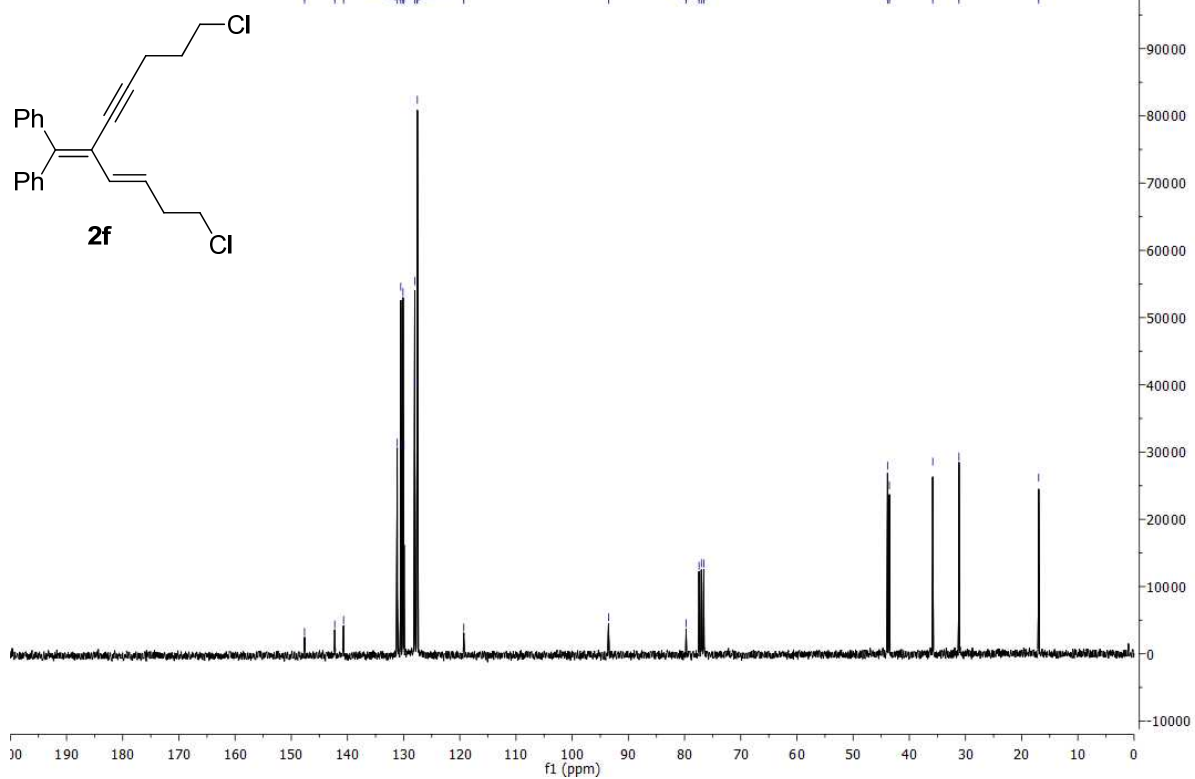



161230-dxw  
dxw-33 1H-NMR CDCl3 303K AV-300

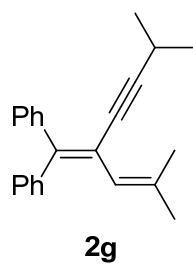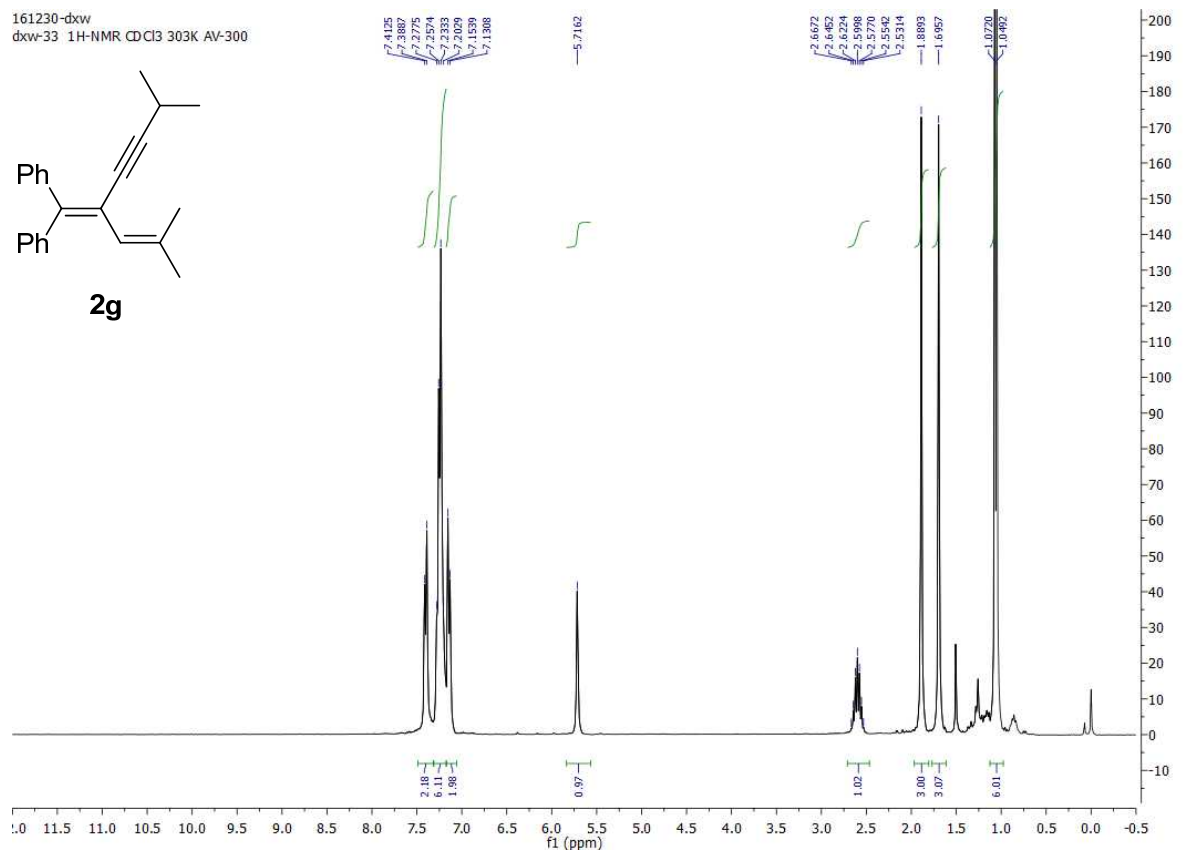

161230-dxw  
dxw-33 13C-NMR CDCl3 303K AV-300

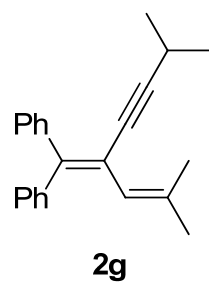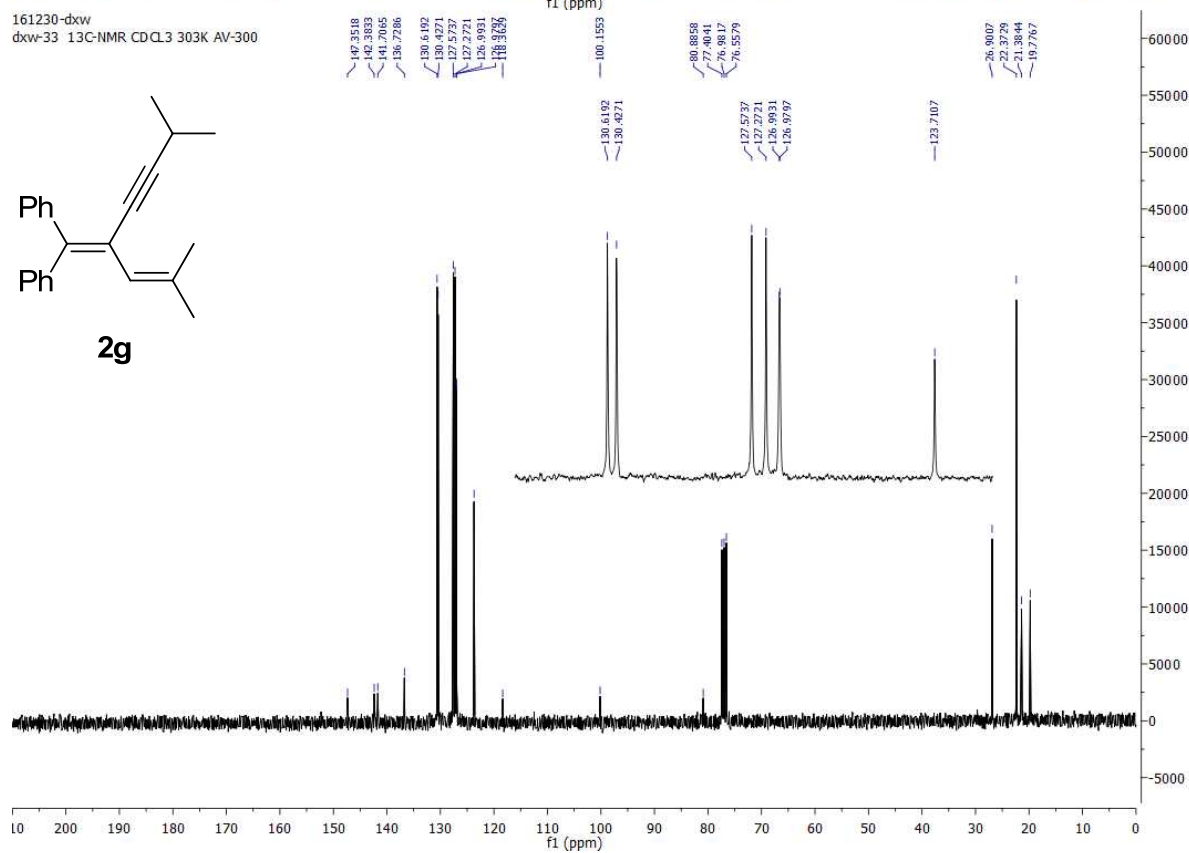

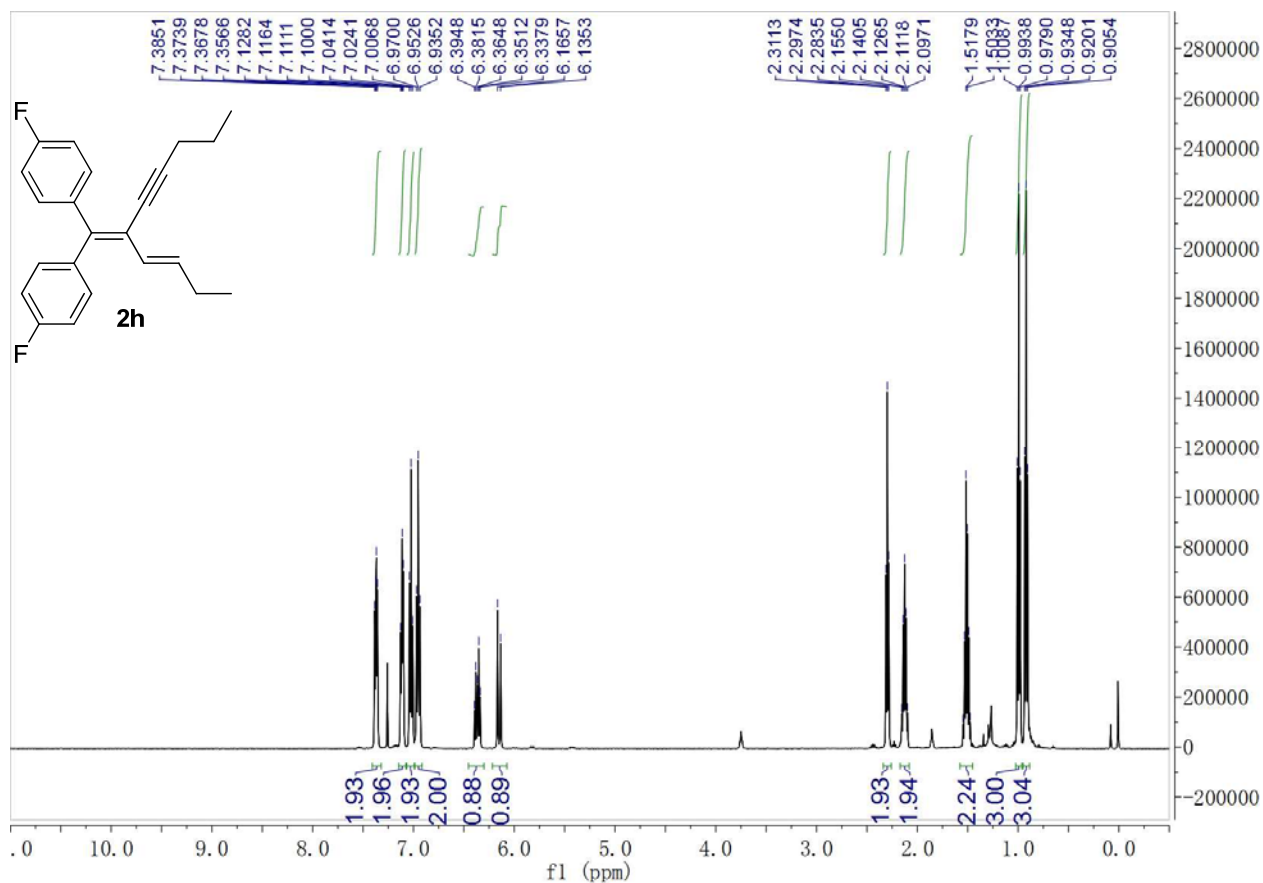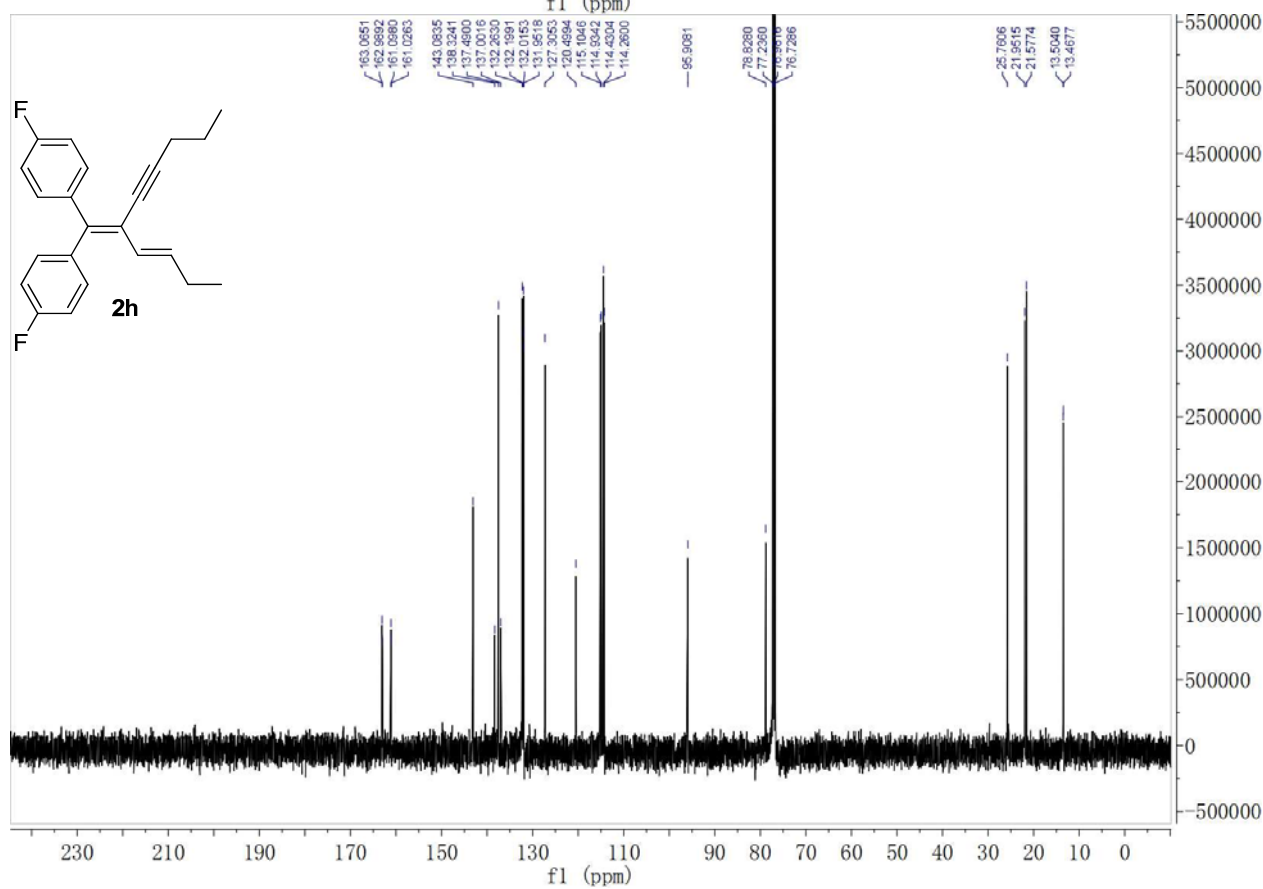

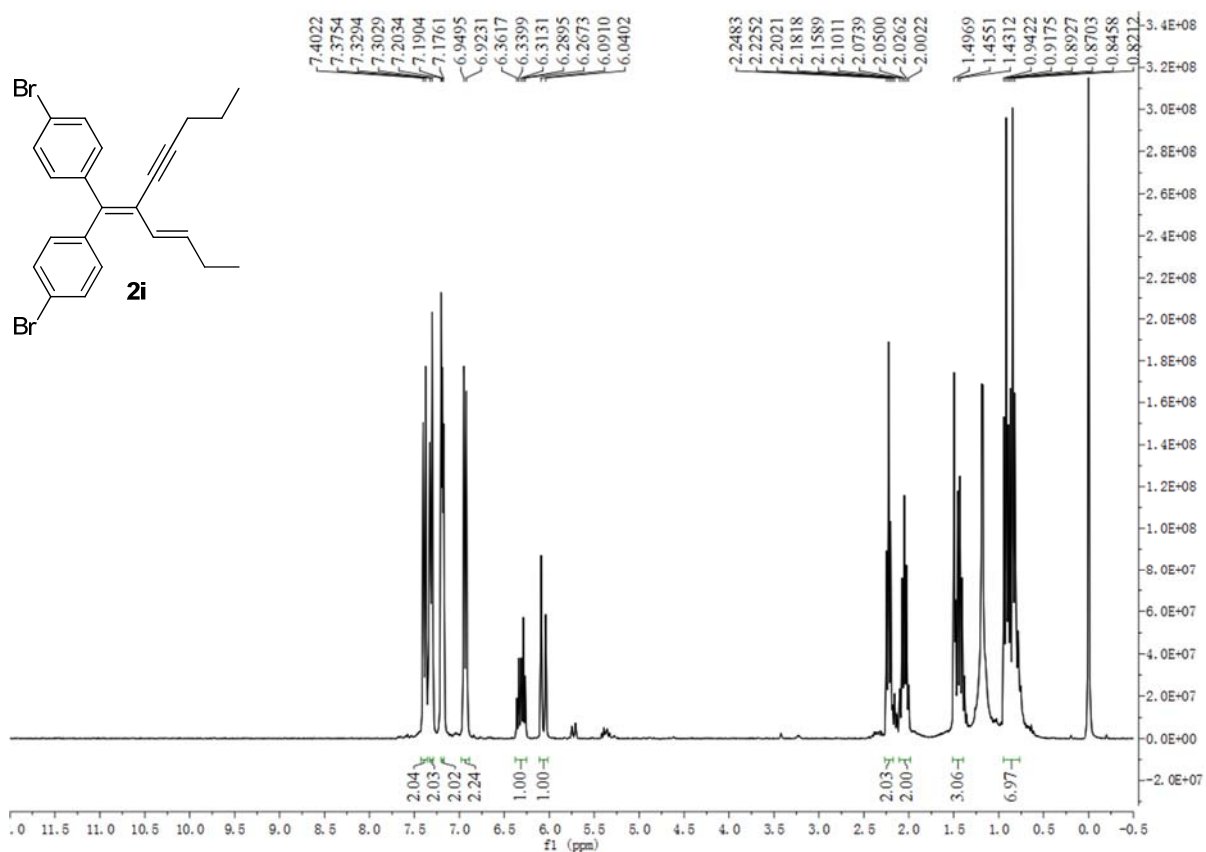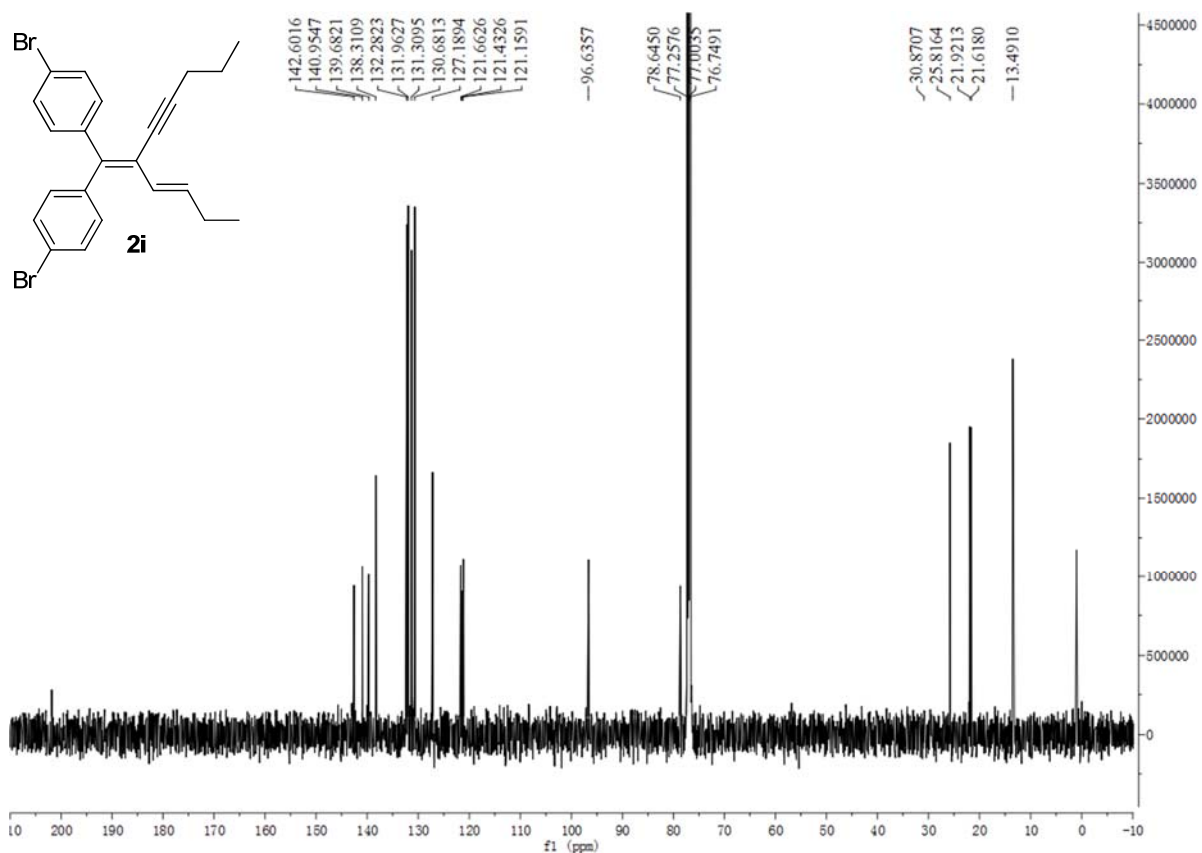

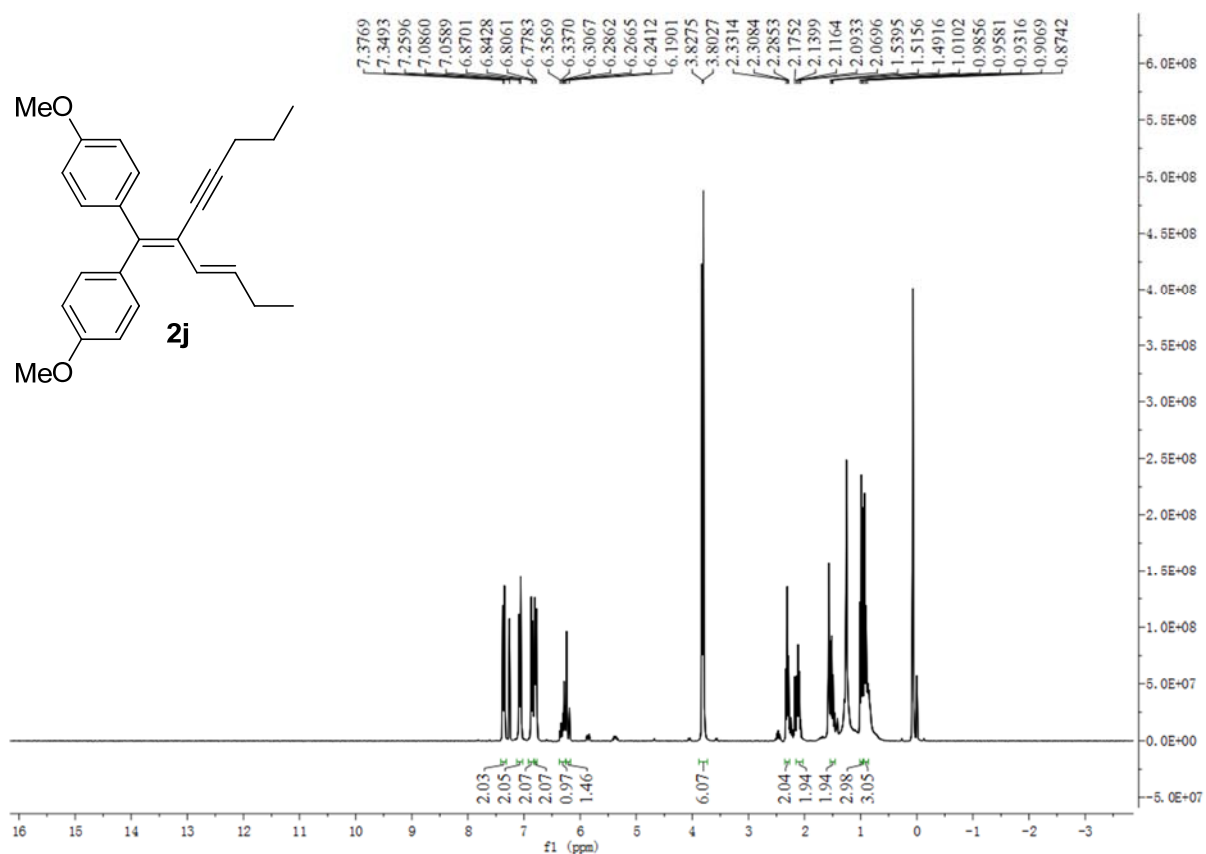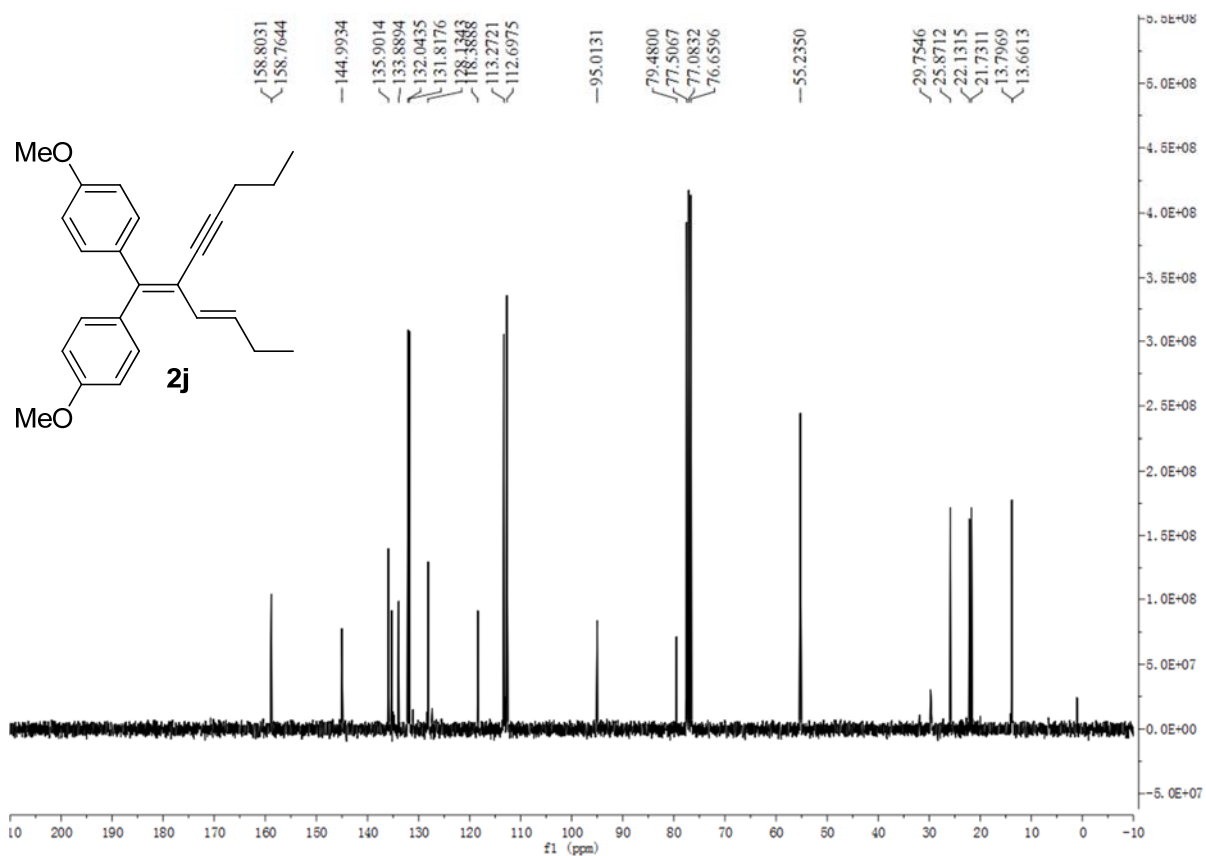

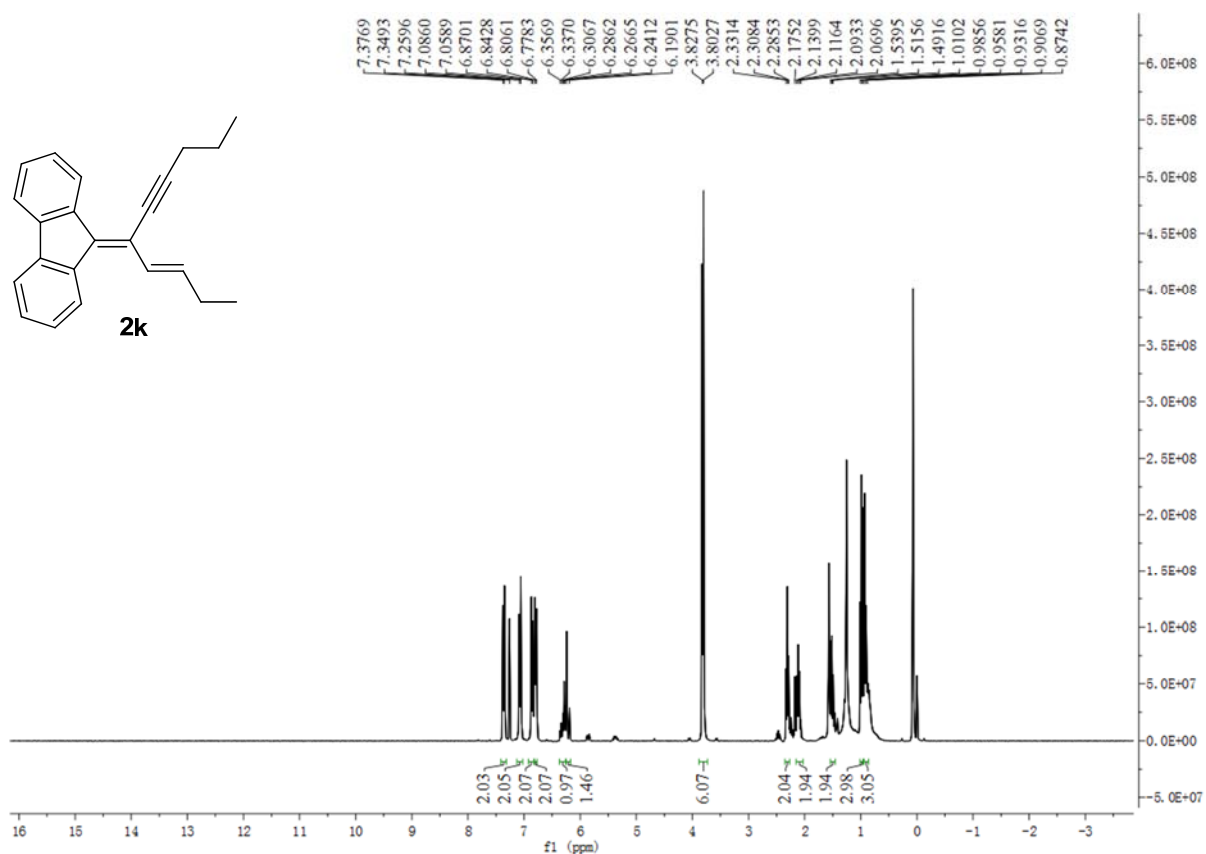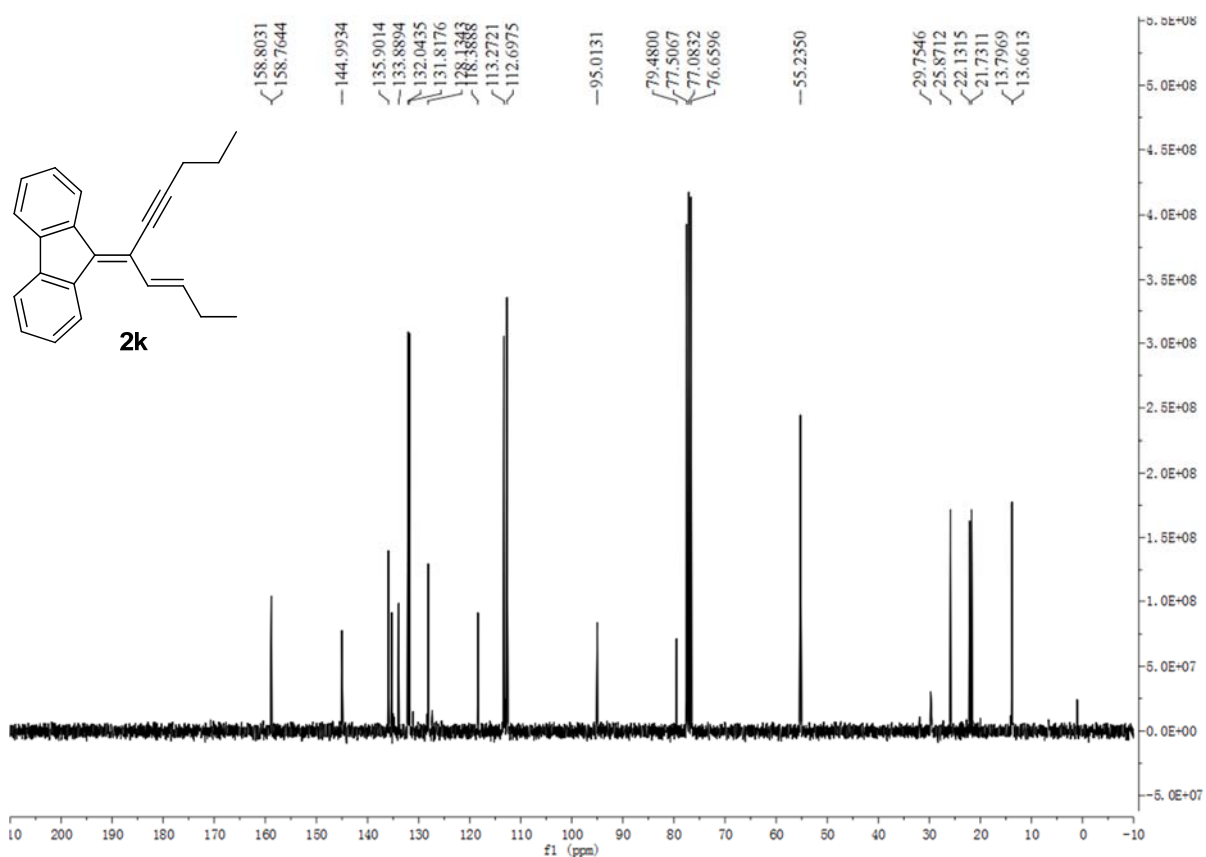

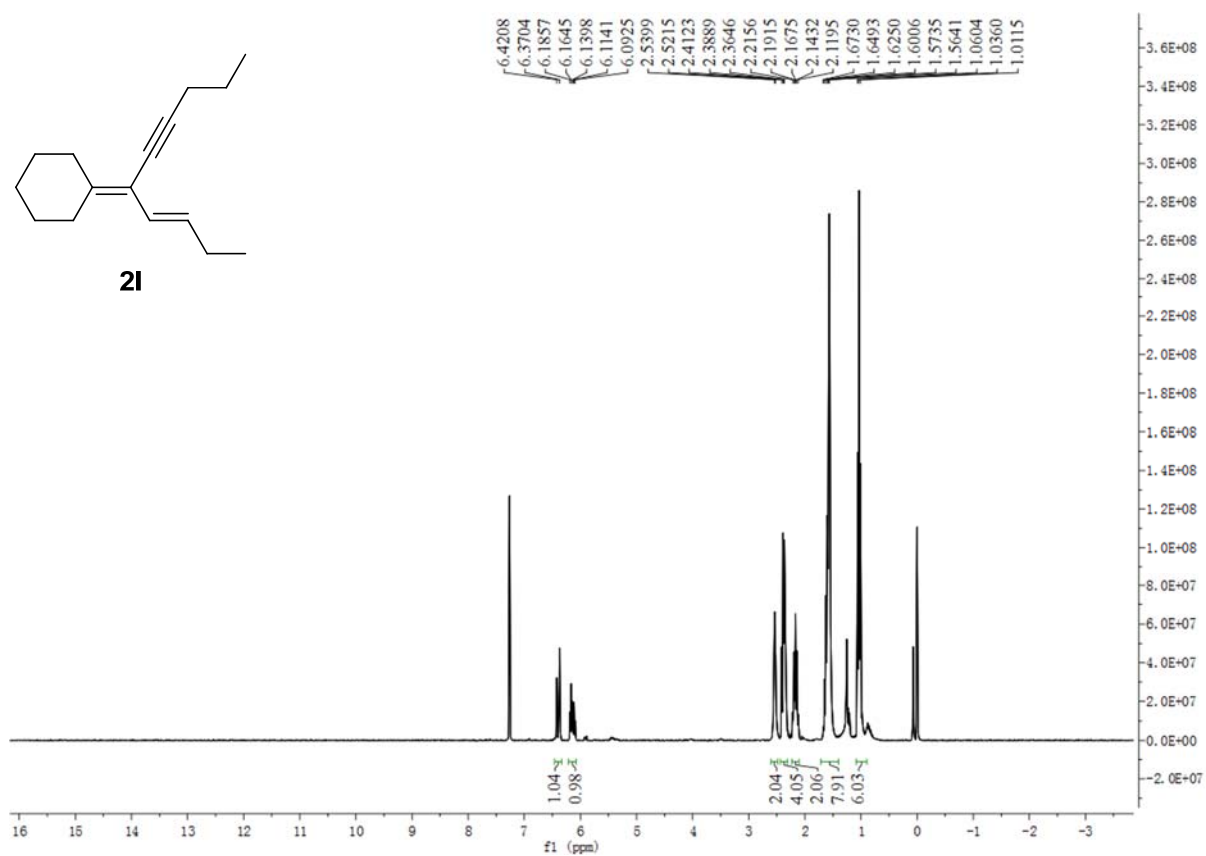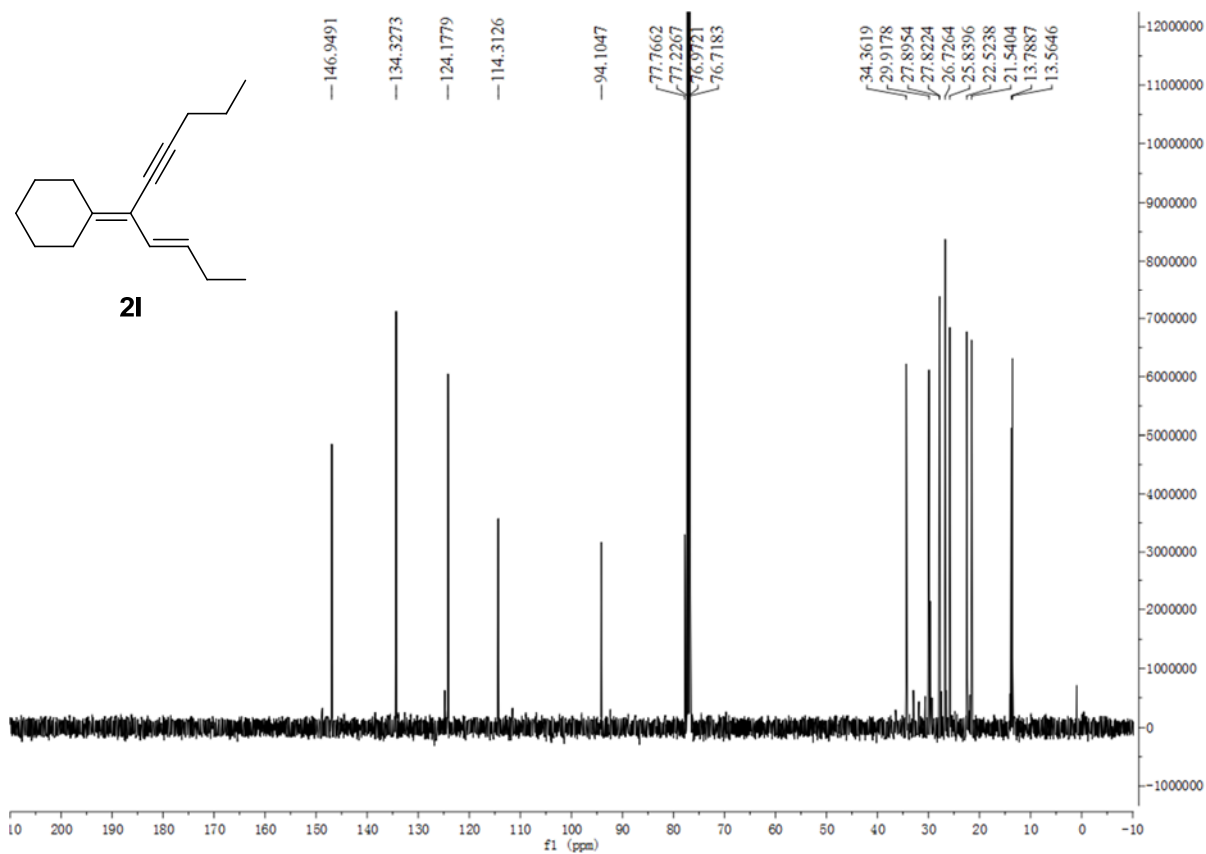

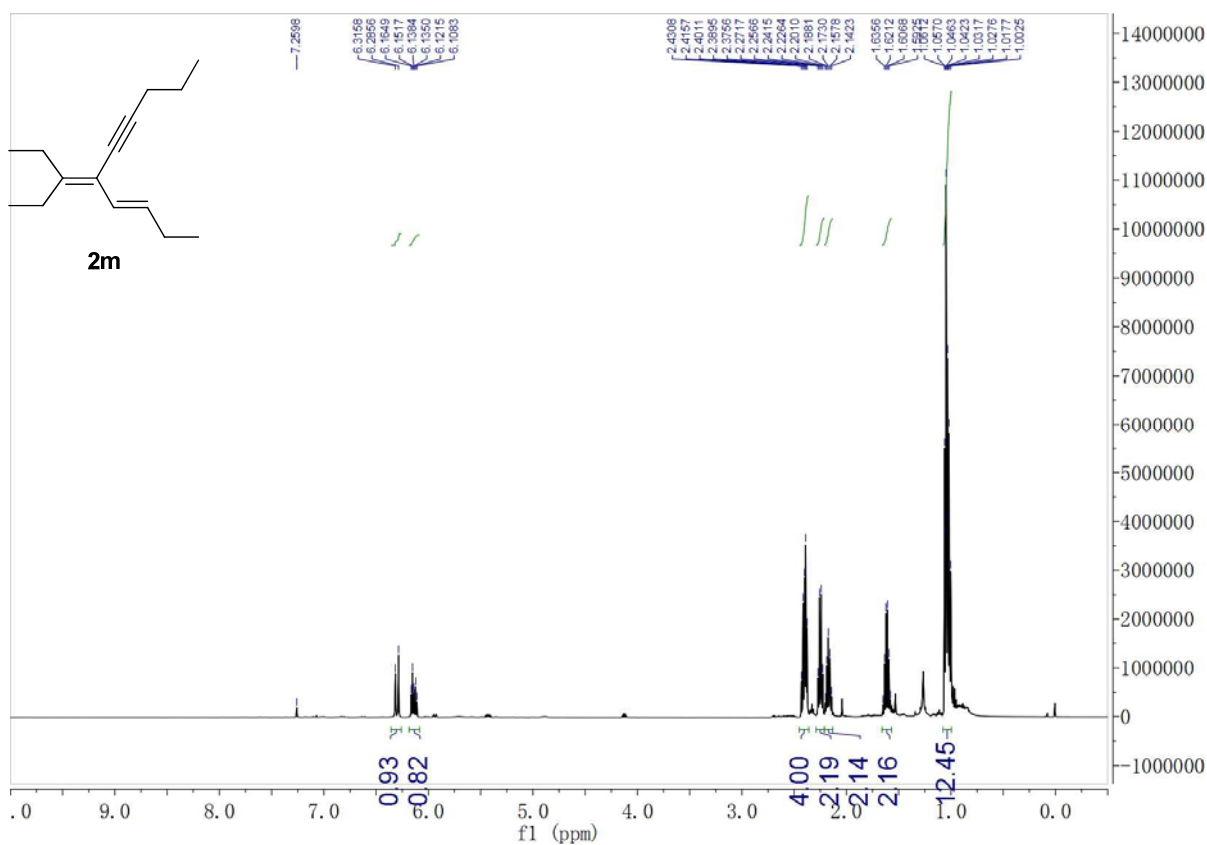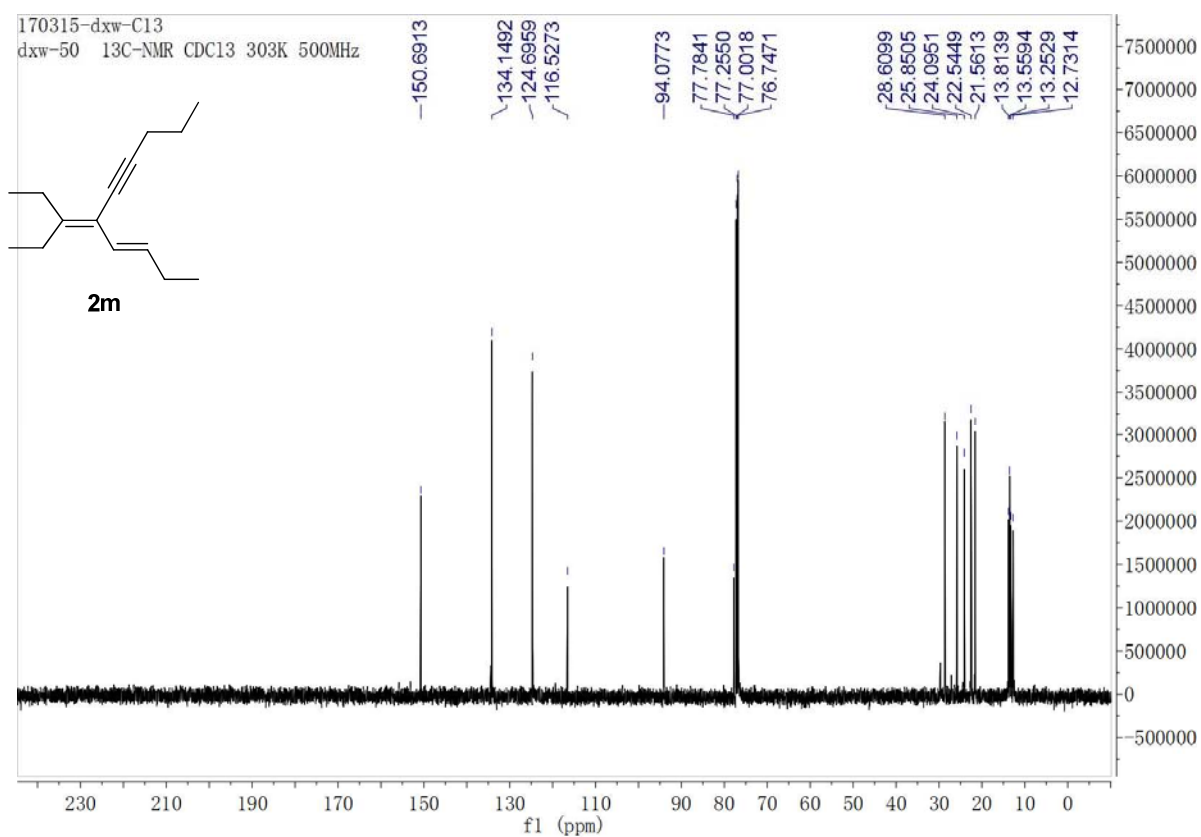

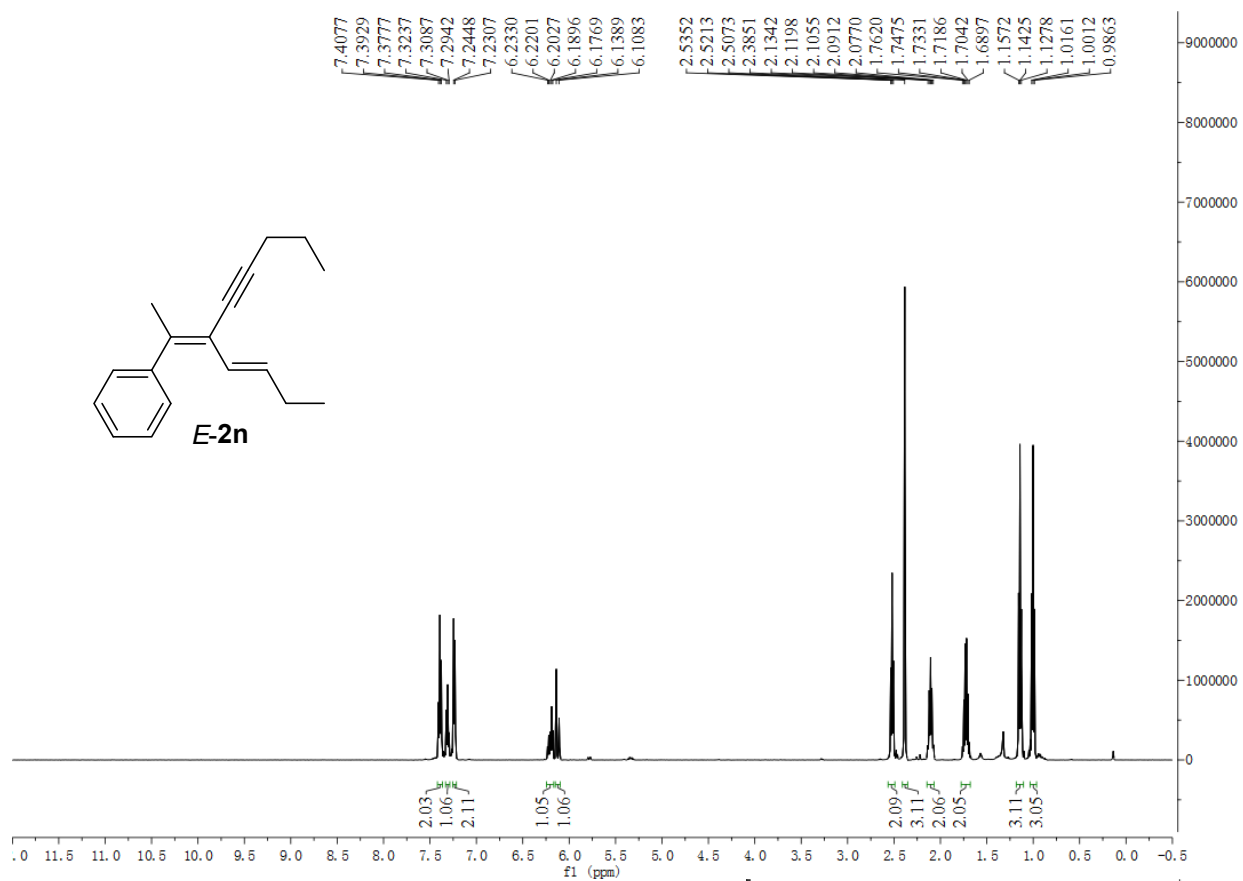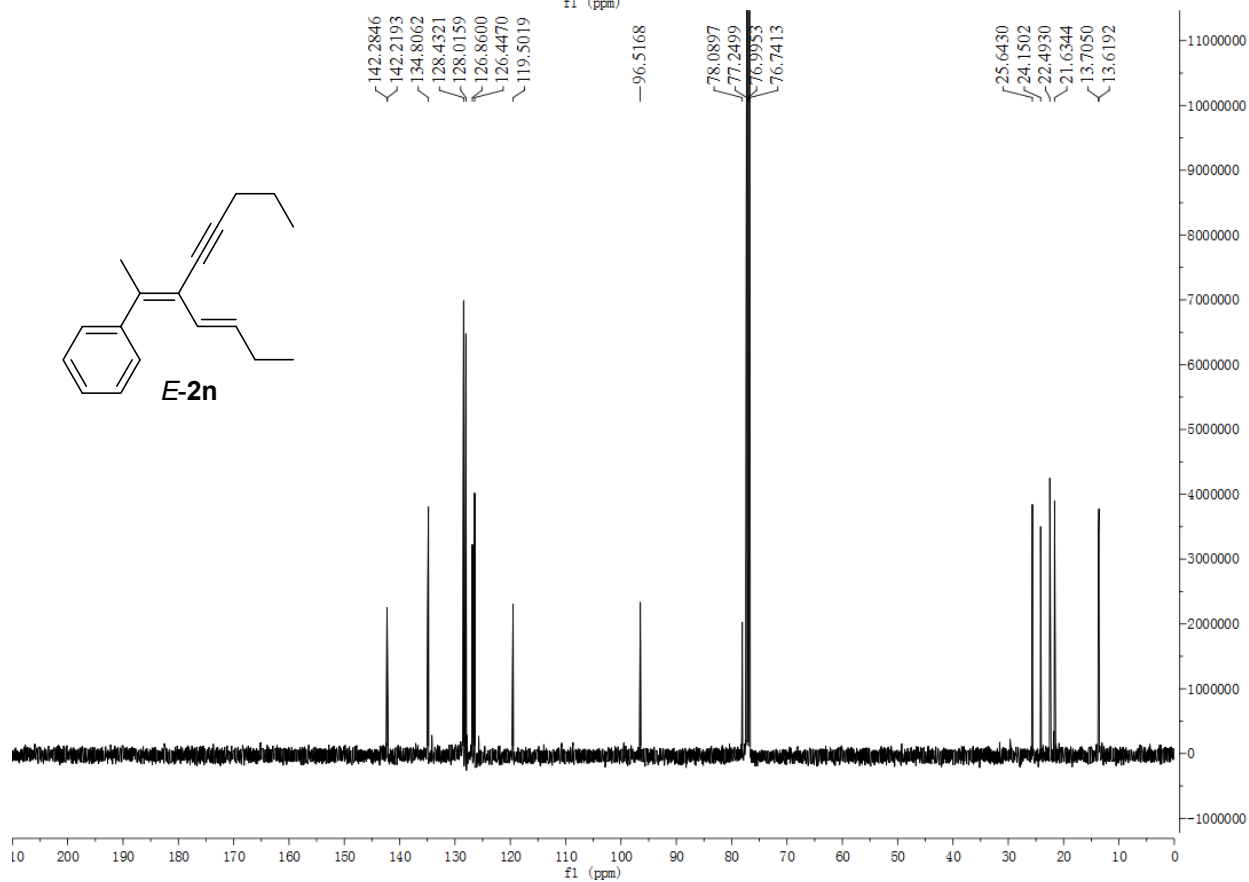



273-1 NOESY CDCl<sub>3</sub> 303K 500MHz

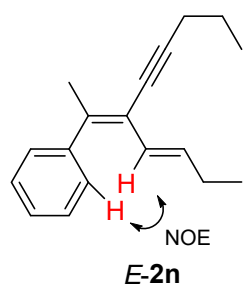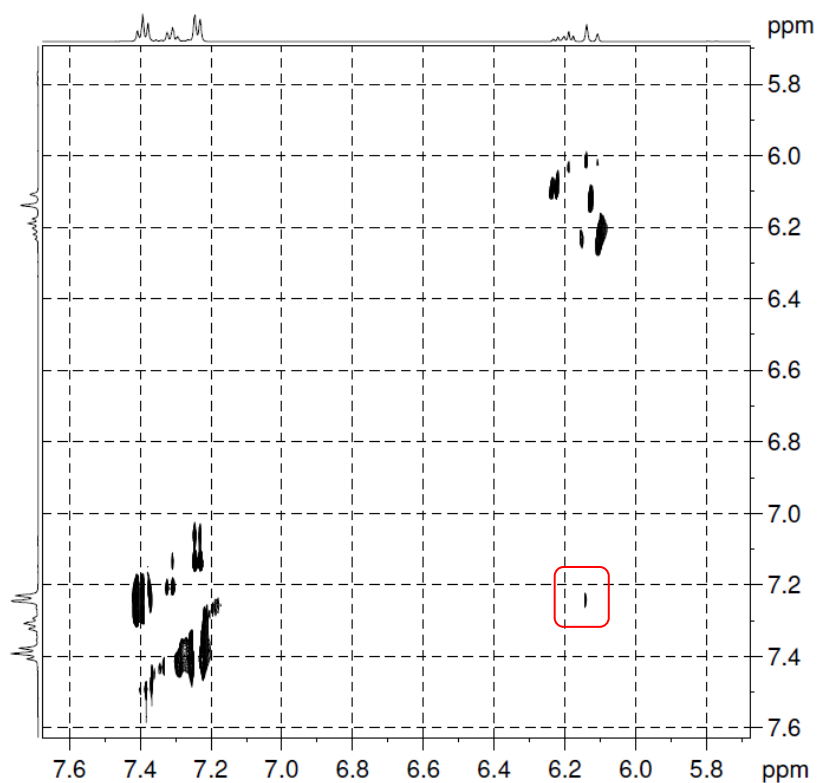

273-1 NOESY CDCl<sub>3</sub> 303K 500MHz

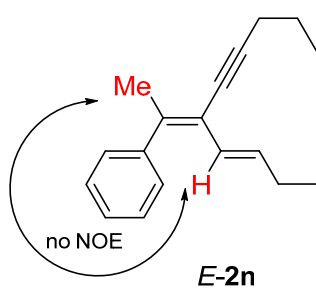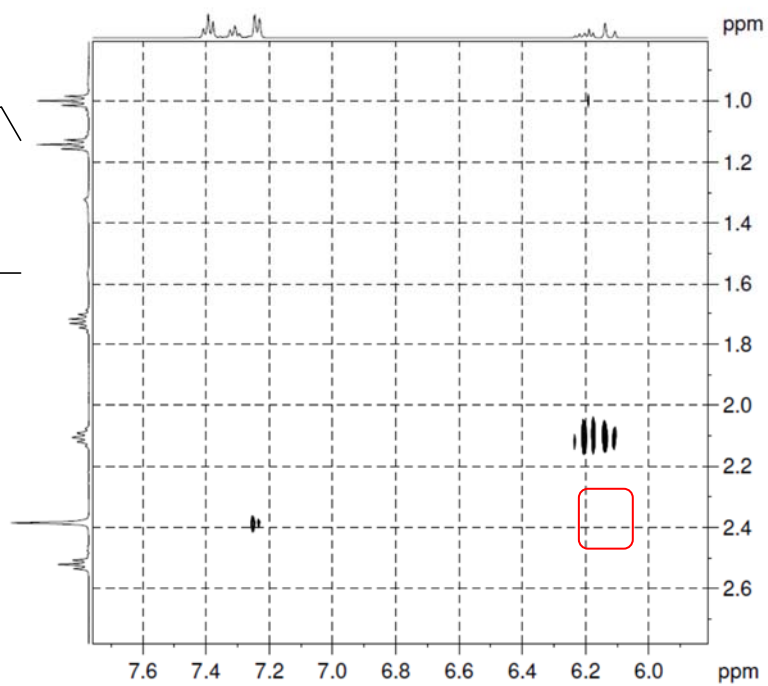

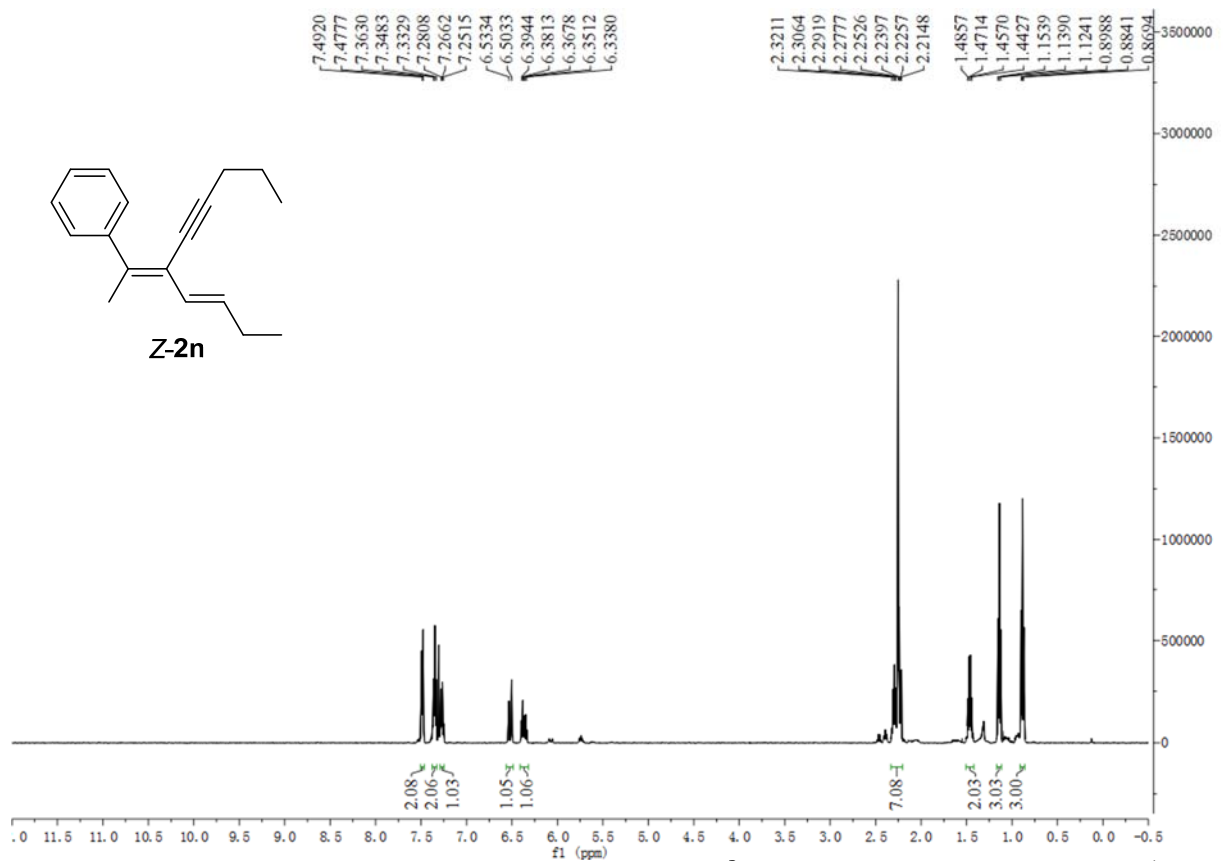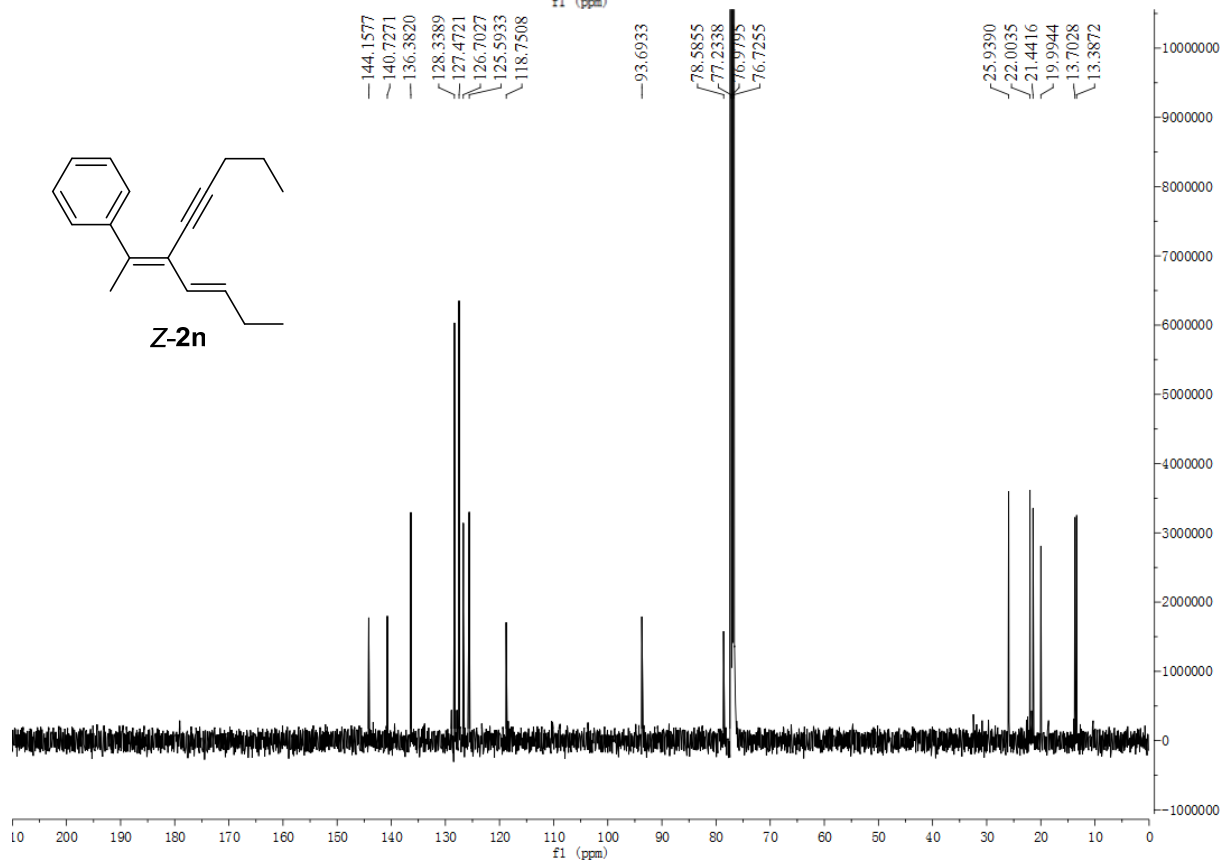

273-2 NOESY CDCl<sub>3</sub> 303K 500MHz

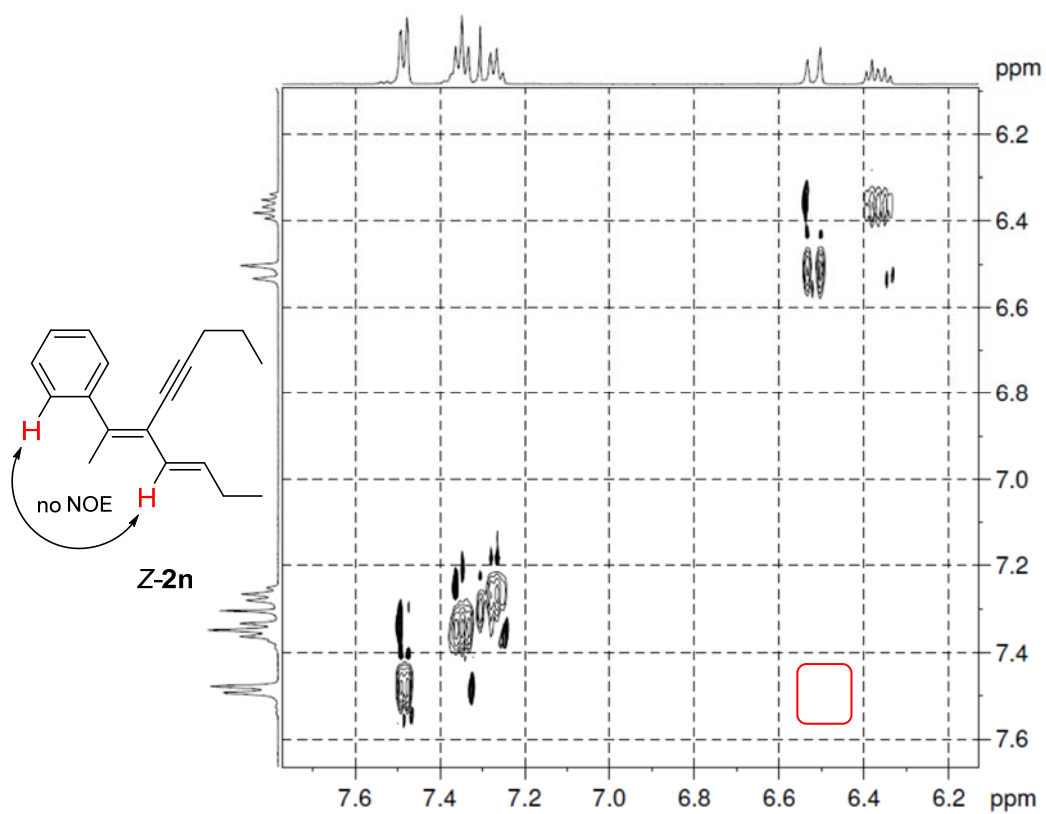

273-2 NOESY CDCl<sub>3</sub> 303K 500MHz

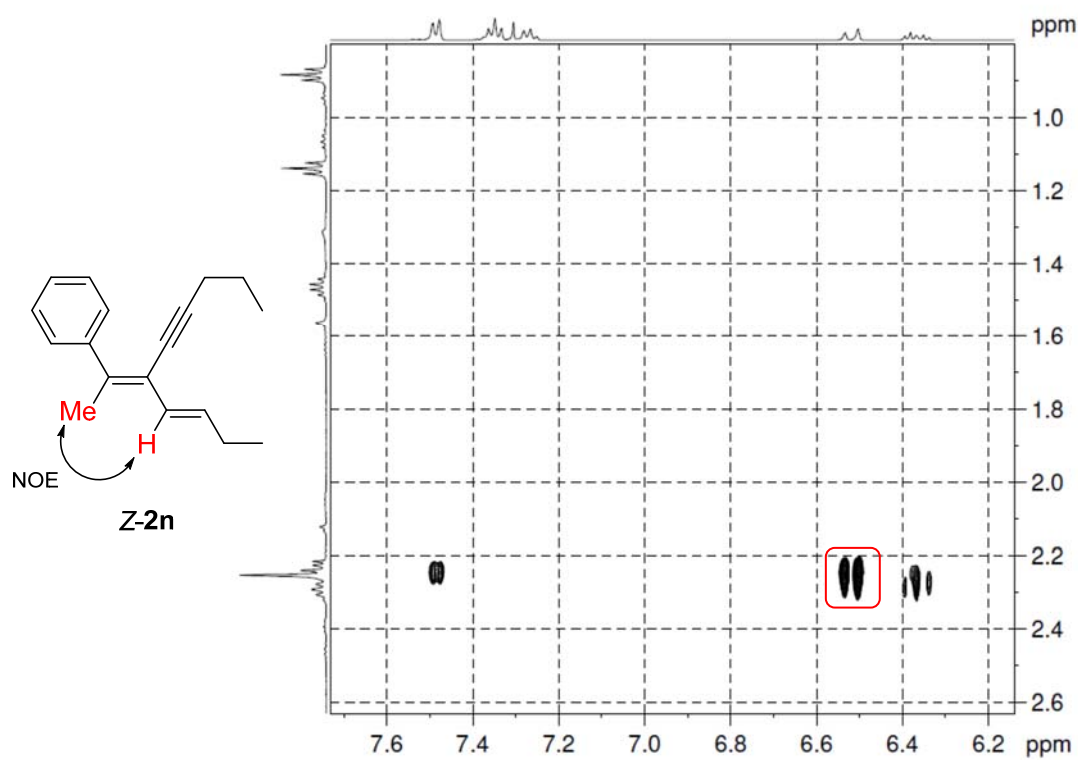

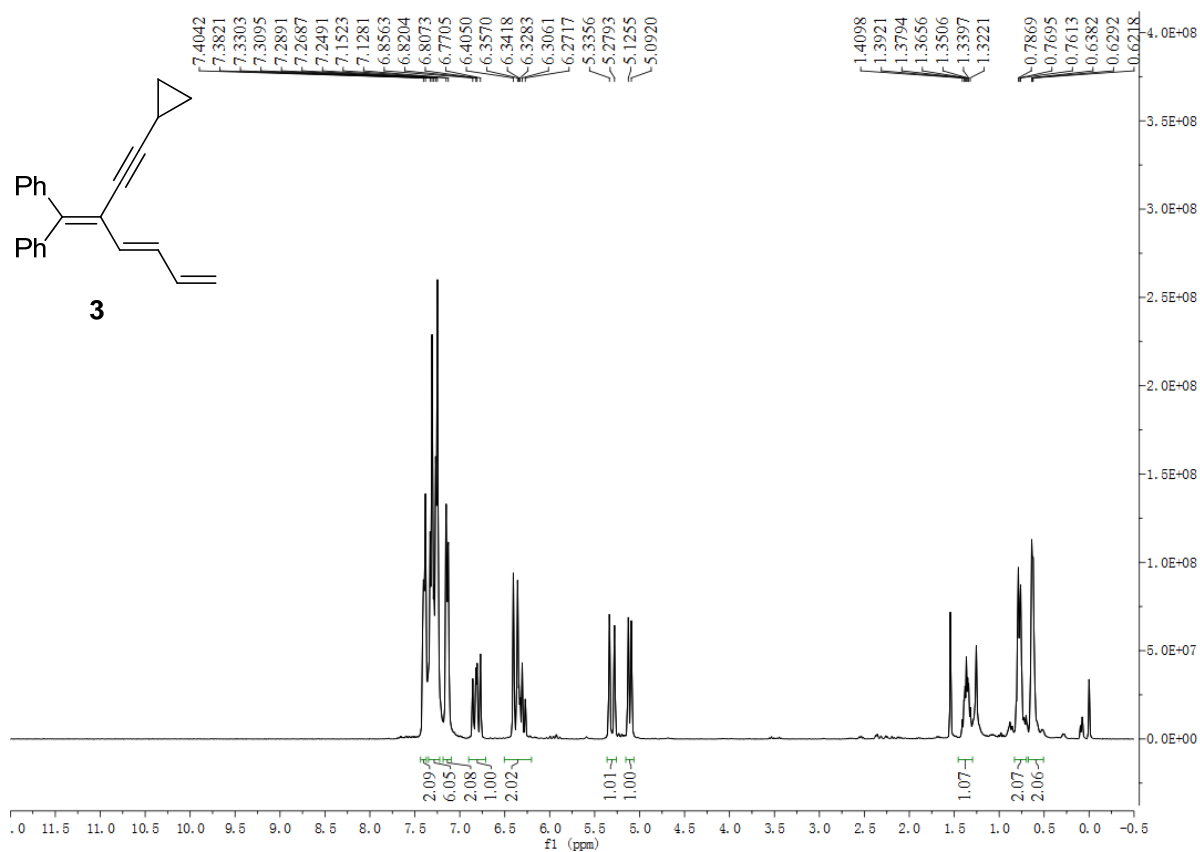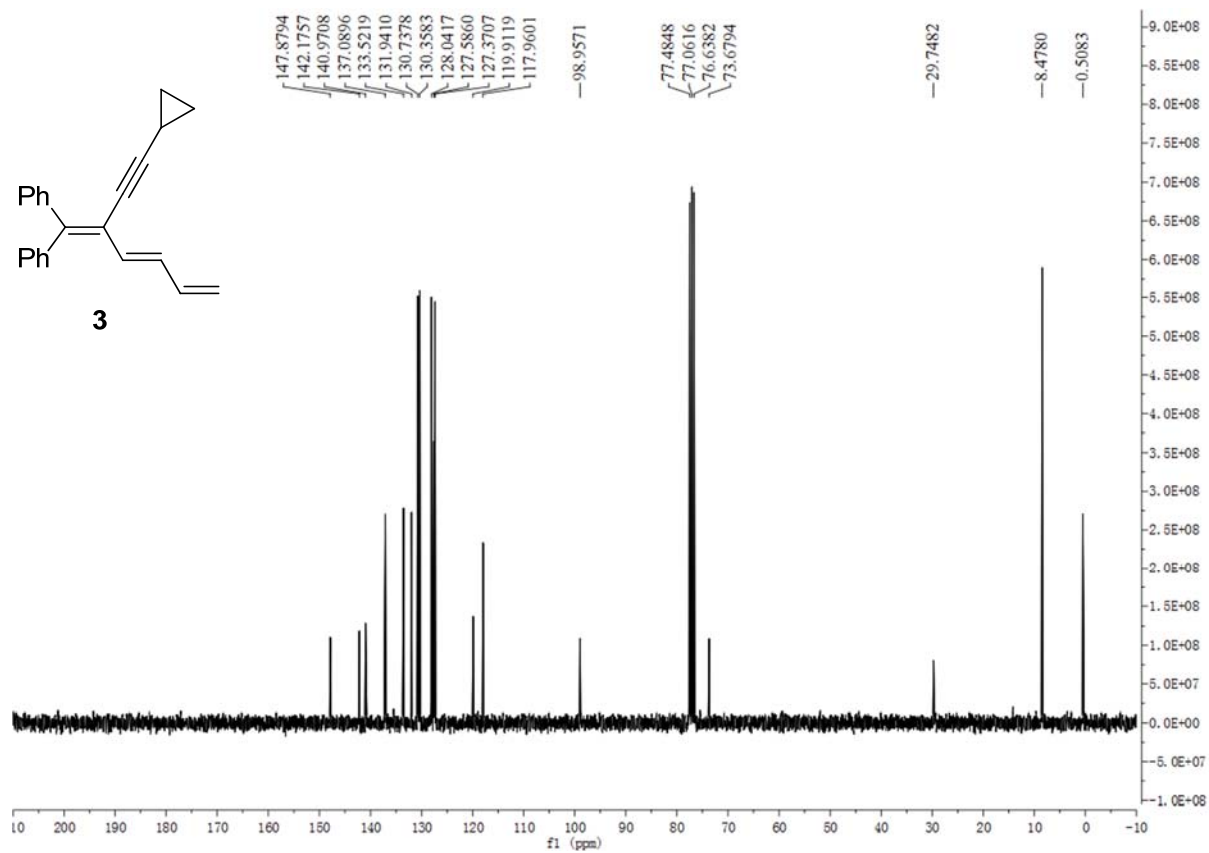

Supplement: Supplementary file 1 [file 10060645]
